# Supplementary material for: Development of Phenalenone-Triazolium Salt Derivatives for aPDT: Synthesis and Antibacterial Screening
Source: MDPI journal article supplement (doi:10.3390/antibiotics10060626), 2021-05-24

## Supplementary Materials

### Development of phenalenone-triazolium salts derivatives for aPDT: synthesis and antibacterial screening.

Jérémy Godard<sup>1</sup>, Dáire Gibbons<sup>1,2</sup>, Stéphanie Leroy-Lhez<sup>1</sup>, René M. Williams<sup>2</sup>, Nicolas Villandier<sup>1</sup>,  
Tan-Sothea Ouk<sup>1</sup>, Frédérique Brégier<sup>1</sup> and Vincent Sol<sup>1\*</sup>

<sup>1</sup> Université de Limoges, PEIRENE, EA 7500, 123 Avenue Albert Thomas, 87060 Limoges Cedex, France.

<sup>2</sup> Molecular Photonics Group, Van't Hoff Institute for Molecular Sciences (HIMS), Universiteit van Amsterdam, Science Park 904, 1098 XH Amsterdam, The Netherlands

\* Correspondence: vincent.sol@unilim.fr

Table S1. Molar extinction coefficient ( $\epsilon$ ), fluorescence quantum yield ( $\Phi_f$ ), and singlet oxygen quantum yield ( $\Phi_\Delta$ ) of the tested PN in water ..... 3

|                                                                                                                        |    |
|------------------------------------------------------------------------------------------------------------------------|----|
| Figure S1. <sup>1</sup> H NMR of compound <b>7</b> in CDCl <sub>3</sub> .....                                          | 4  |
| Figure S2. <sup>13</sup> C NMR of compound <b>7</b> in CDCl <sub>3</sub> .....                                         | 4  |
| Figure S3. HRMS ESI <sup>+</sup> of compound <b>7</b> .....                                                            | 5  |
| Figure S4. <sup>1</sup> H NMR of compound <b>8</b> in CDCl <sub>3</sub> .....                                          | 6  |
| Figure S5. <sup>13</sup> C NMR of compound <b>8</b> in CDCl <sub>3</sub> .....                                         | 6  |
| Figure S6. HRMS ESI <sup>+</sup> of compound <b>8</b> .....                                                            | 7  |
| Figure S7. <sup>1</sup> H NMR of compound <b>4a</b> in CDCl <sub>3</sub> .....                                         | 8  |
| Figure S8. <sup>13</sup> C NMR of compound <b>4a</b> in CDCl <sub>3</sub> .....                                        | 8  |
| Figure S9. HRMS ESI <sup>+</sup> of compound <b>4a</b> .....                                                           | 9  |
| Figure S10. <sup>1</sup> H NMR of compound <b>4b</b> in CDCl <sub>3</sub> .....                                        | 10 |
| Figure S11. <sup>13</sup> C NMR of compound <b>4b</b> in CDCl <sub>3</sub> .....                                       | 10 |
| Figure S12. HRMS ESI <sup>+</sup> of compound <b>4b</b> .....                                                          | 11 |
| Figure S13. <sup>1</sup> H NMR of compound <b>5a</b> in D <sub>2</sub> O .....                                         | 12 |
| Figure S14. <sup>13</sup> C NMR of compound <b>5a</b> in D <sub>2</sub> O .....                                        | 12 |
| Figure S15. HRMS ESI <sup>+</sup> of compound <b>5a</b> .....                                                          | 13 |
| Figure S16. <sup>1</sup> H NMR of compound <b>5b</b> in D <sub>2</sub> O .....                                         | 14 |
| Figure S17. <sup>13</sup> C NMR of compound <b>5b</b> in D <sub>2</sub> O (*contamination by compound <b>5</b> ) ..... | 14 |
| Figure S18. HRMS ESI <sup>+</sup> of compound <b>5b</b> .....                                                          | 15 |
| Figure S19. <sup>1</sup> H NMR of compound <b>6a</b> in CDCl <sub>3</sub> .....                                        | 16 |
| Figure S20. <sup>13</sup> C NMR of compound <b>6a</b> in CDCl <sub>3</sub> .....                                       | 16 |
| Figure S21. HRMS ESI <sup>+</sup> of compound <b>6a</b> .....                                                          | 17 |
| Figure S22. <sup>1</sup> H NMR of compound <b>6b</b> in CDCl <sub>3</sub> .....                                        | 18 |
| Figure S23. <sup>13</sup> C NMR of compound <b>6b</b> in CDCl <sub>3</sub> .....                                       | 18 |
| Figure S24. HRMS ESI <sup>+</sup> of compound <b>6b</b> .....                                                          | 19 |
| Figure S25. <sup>1</sup> H NMR of compound <b>7a</b> in CDCl <sub>3</sub> .....                                        | 20 |
| Figure S26. <sup>13</sup> C NMR of compound <b>7a</b> in CDCl <sub>3</sub> .....                                       | 20 |
| Figure S27. HRMS ESI <sup>+</sup> of compound <b>7a</b> .....                                                          | 21 |
| Figure S28. <sup>1</sup> H NMR of compound <b>7b</b> in CDCl <sub>3</sub> .....                                        | 22 |
| Figure S29. <sup>13</sup> C NMR of compound <b>7b</b> in CDCl <sub>3</sub> .....                                       | 22 |
| Figure S30. HRMS ESI <sup>+</sup> of compound <b>7b</b> .....                                                          | 23 |

|                                                                                      |    |
|--------------------------------------------------------------------------------------|----|
| Figure S31. $^1\text{H}$ NMR of compound <b>8a</b> in $\text{CDCl}_3$ .....          | 24 |
| Figure S32. $^{13}\text{C}$ NMR of compound <b>8a</b> in $\text{CDCl}_3$ .....       | 24 |
| Figure S33. HRMS ESI $^+$ of compound <b>8a</b> .....                                | 25 |
| Figure S34. $^1\text{H}$ NMR of compound <b>8b</b> in $\text{CDCl}_3$ .....          | 26 |
| Figure S35. $^{13}\text{C}$ NMR of compound <b>8b</b> in $\text{CDCl}_3$ .....       | 26 |
| Figure S36. HRMS ESI $^+$ of compound <b>8b</b> .....                                | 27 |
| Figure S37. $^1\text{H}$ NMR of compound <b>9a</b> in $\text{CDCl}_3$ .....          | 28 |
| Figure S38. $^{13}\text{C}$ NMR of compound <b>9a</b> in $\text{CDCl}_3$ .....       | 28 |
| Figure S39. HRMS ESI $^+$ of compound <b>9a</b> .....                                | 29 |
| Figure S40. $^1\text{H}$ NMR of compound <b>9b</b> in $\text{CDCl}_3$ .....          | 30 |
| Figure S41. $^{13}\text{C}$ NMR of compound <b>9b</b> in $\text{CDCl}_3$ .....       | 30 |
| Figure S42. HRMS ESI $^+$ of compound <b>9b</b> .....                                | 31 |
| Figure S43. $^1\text{H}$ NMR of compound <b>10a</b> in $\text{DMSO}-d_6$ .....       | 32 |
| Figure S44. $^{13}\text{C}$ NMR of compound <b>10a</b> in $\text{DMSO}-d_6$ .....    | 32 |
| Figure S45. HRMS ESI $^+$ of compound <b>10a</b> .....                               | 33 |
| Figure S46. $^1\text{H}$ NMR of compound <b>10b</b> in $\text{D}_2\text{O}$ .....    | 34 |
| Figure S47. $^{13}\text{C}$ NMR of compound <b>10b</b> in $\text{D}_2\text{O}$ ..... | 34 |
| Figure S48. HRMS ESI $^+$ of compound <b>10b</b> .....                               | 35 |
| Figure S49. Chemical structure of all compounds .....                                | 36 |

Table S1. Molar extinction coefficient ( $\epsilon$ ), fluorescence quantum yield ( $\Phi_f$ ), and singlet oxygen quantum yield ( $\Phi_\Delta$ ) of the tested PN in water

| Compound | $\epsilon$ (L.mol <sup>-1</sup> .cm <sup>-1</sup> ) | $\Phi_f$ | $\Phi_\Delta$         |
|----------|-----------------------------------------------------|----------|-----------------------|
| PNS      | 9026.88                                             | <0.01    | 0.97                  |
| 4a       | 3538.81                                             | 0.02     | 0.80                  |
| 4b       | 6824.01                                             | 0.01     | >0.98                 |
| 5a       | 8074.44                                             | 0.02     | 0.97                  |
| 5b       | 7265.28                                             | <0.01    | 0.31                  |
| 6a       | 7818.8                                              | <0.01    | 0.70                  |
| 6b       | 4009.84                                             | <0.01    | 0.59                  |
| 7a       | 3493.81                                             | <0.01    | >0.99                 |
| 7b       | 4421.33                                             | <0.01    | N/A – signal not good |
| 8a       | 4189.9                                              | <0.01    | >0.99                 |
| 8b       | 5932.82                                             | <0.01    | N/A – signal not good |
| 9a       | 2417.86                                             | 0.02     | 0.93                  |
| 9b       | 3590.89                                             | 0.01     | 0.23                  |
| 10a      | 3243.01                                             | 0.02     | 0.87                  |
| 10b      | 6414.40                                             | 0.02     | N/A – signal not good |
| 5        | 10396.61                                            | 0.02     | 0.87                  |
| 10       | 2790.03                                             | 0.02     | 0.91                  |
| SAPyr    | 2834.47                                             | 0.02     | 0.83                  |

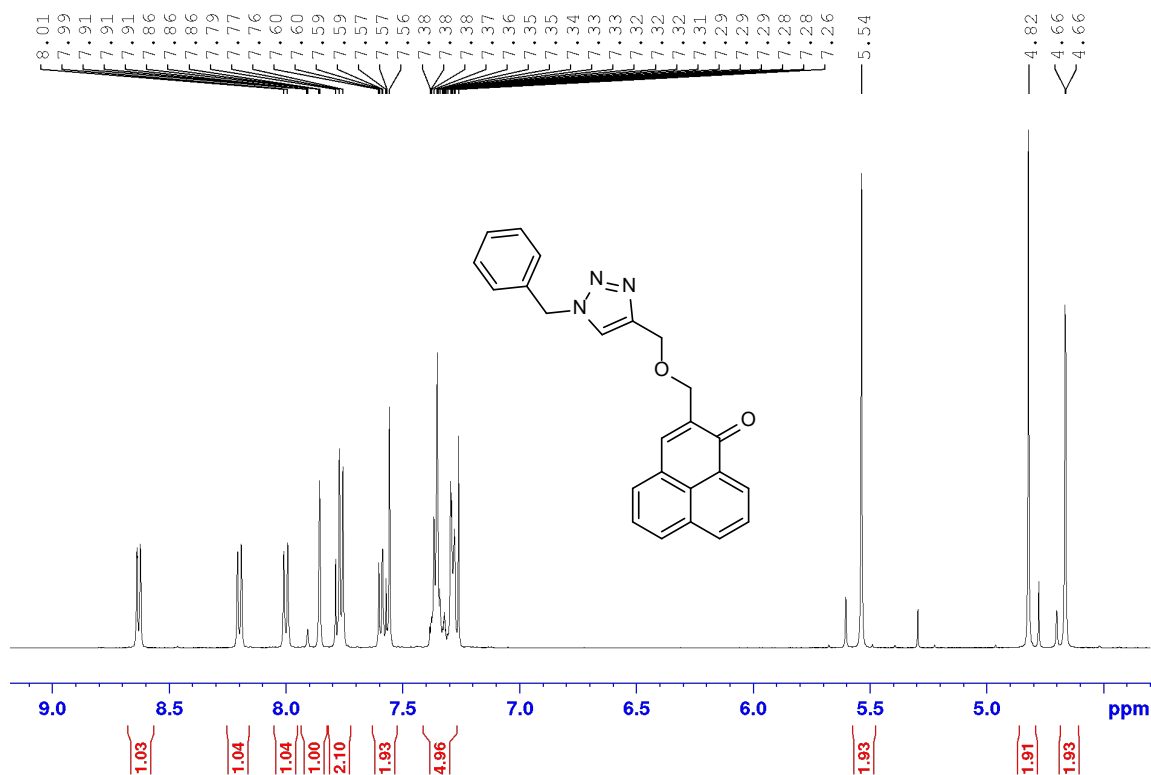

Figure S1. <sup>1</sup>H NMR of compound 7 in CDCl<sub>3</sub>

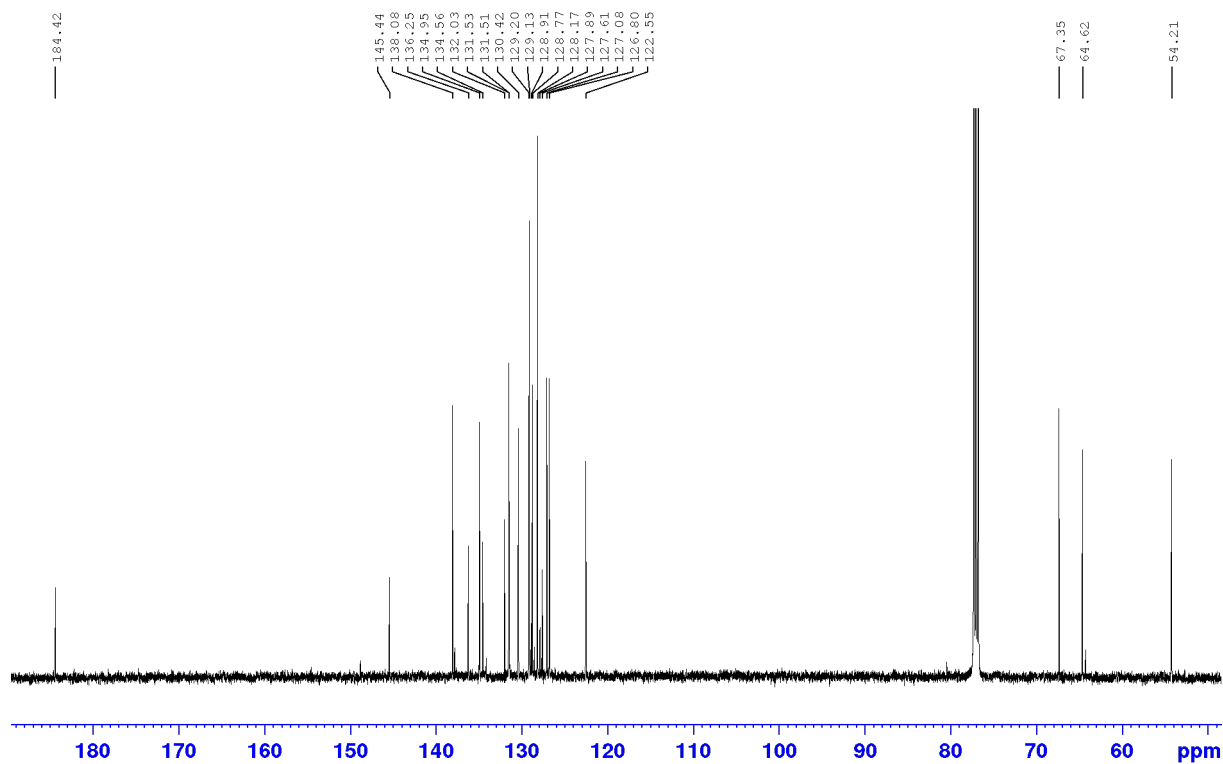

Figure S2. <sup>13</sup>C NMR of compound 7 in CDCl<sub>3</sub>

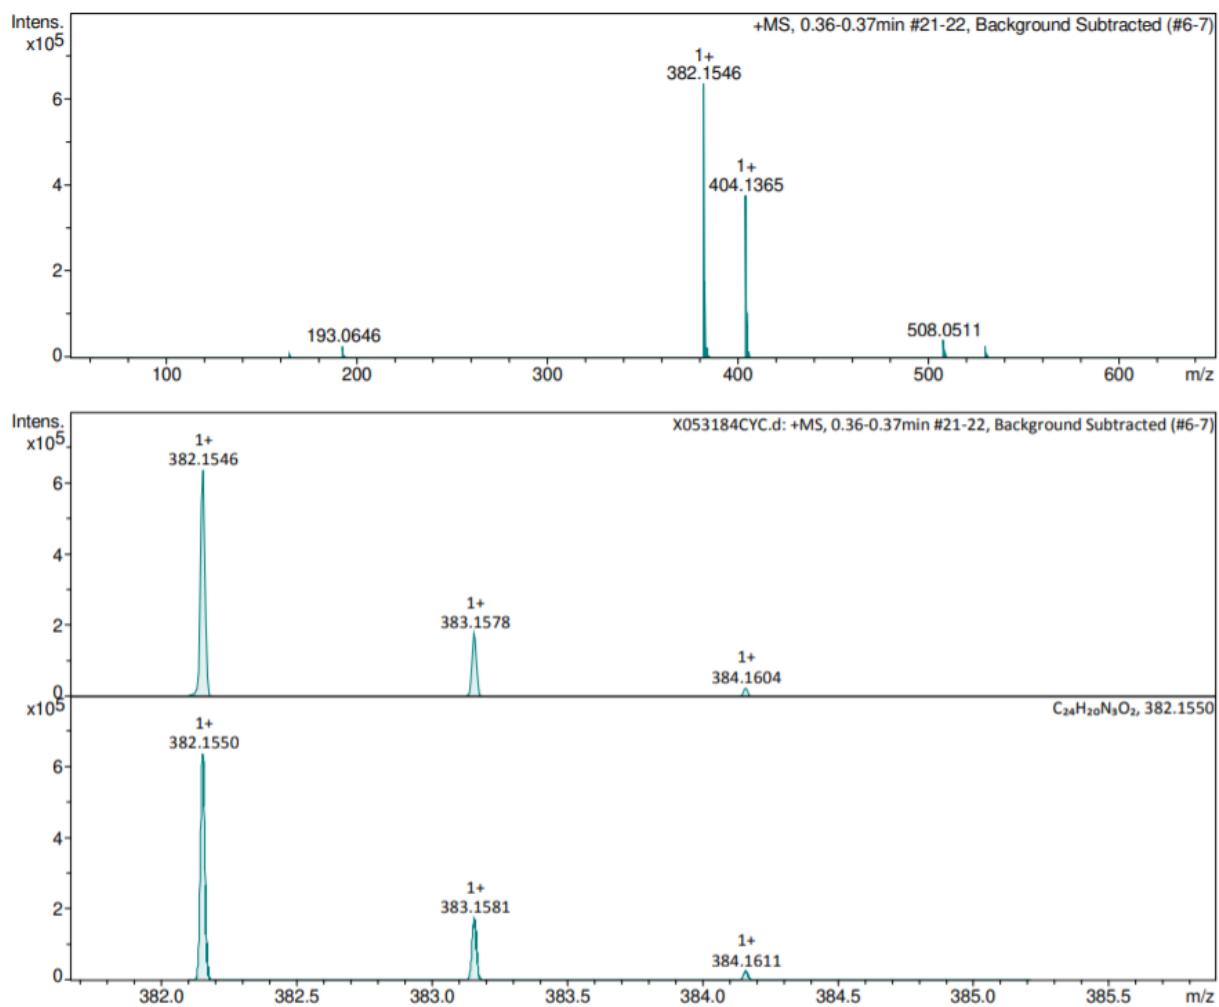

Figure S3. HRMS ESI<sup>+</sup> of compound 7

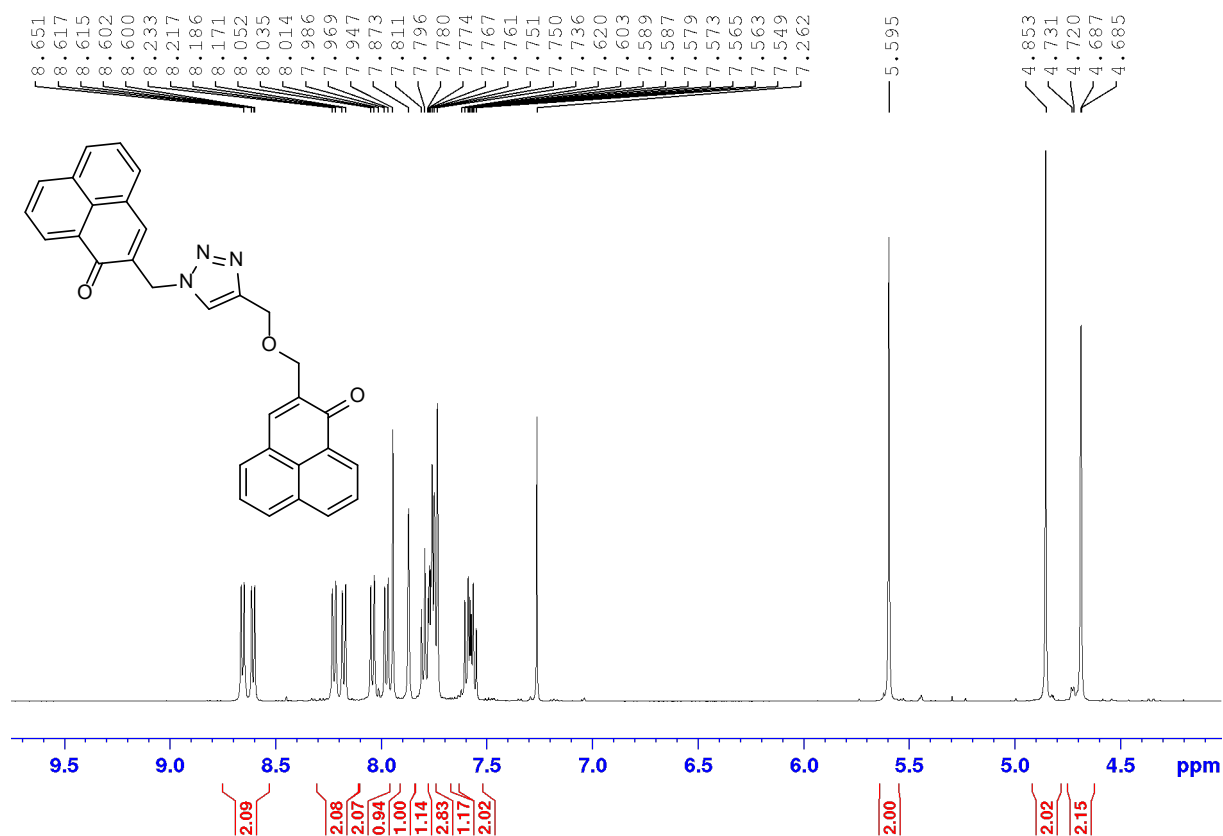

Figure S4. <sup>1</sup>H NMR of compound 8 in CDCl<sub>3</sub>

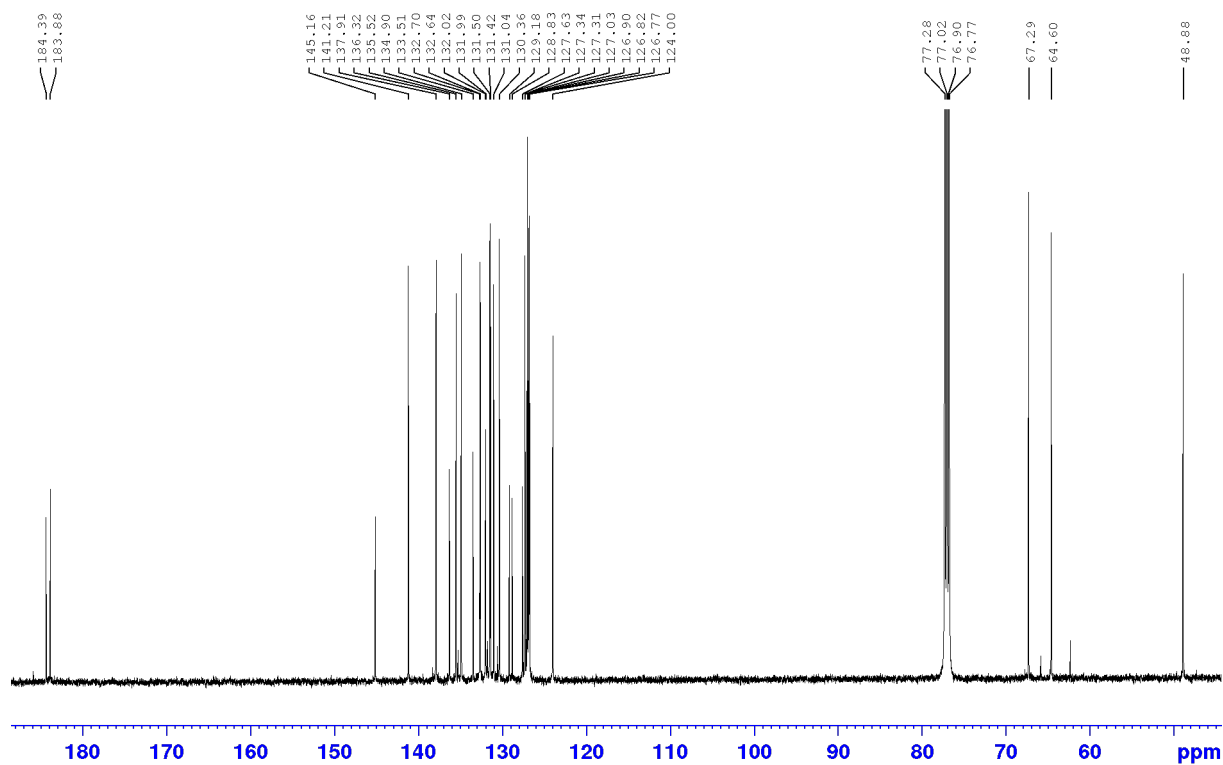

Figure S5. <sup>13</sup>C NMR of compound 8 in CDCl<sub>3</sub>

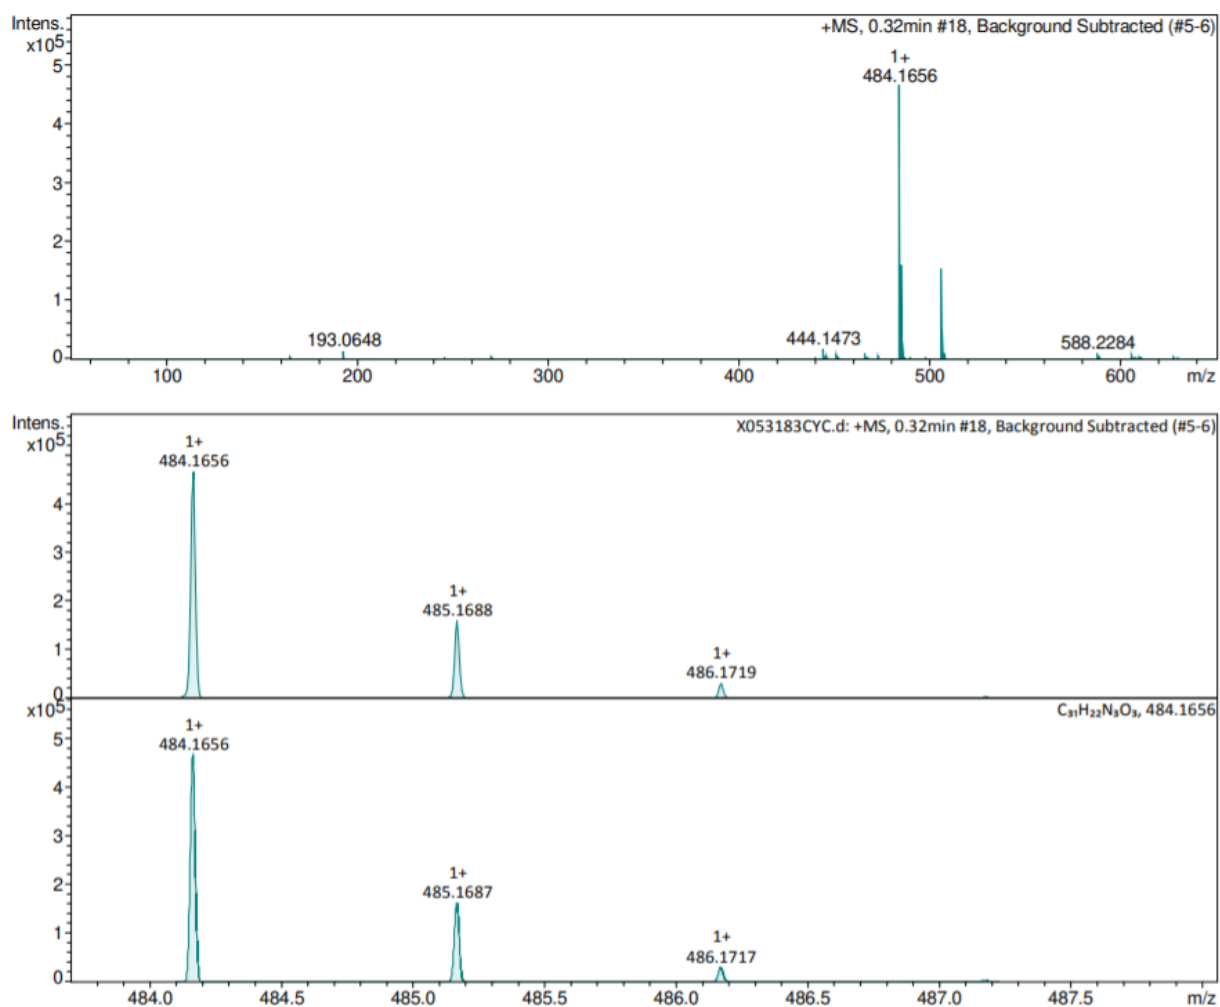

Figure S6. HRMS ESI<sup>+</sup> of compound 8

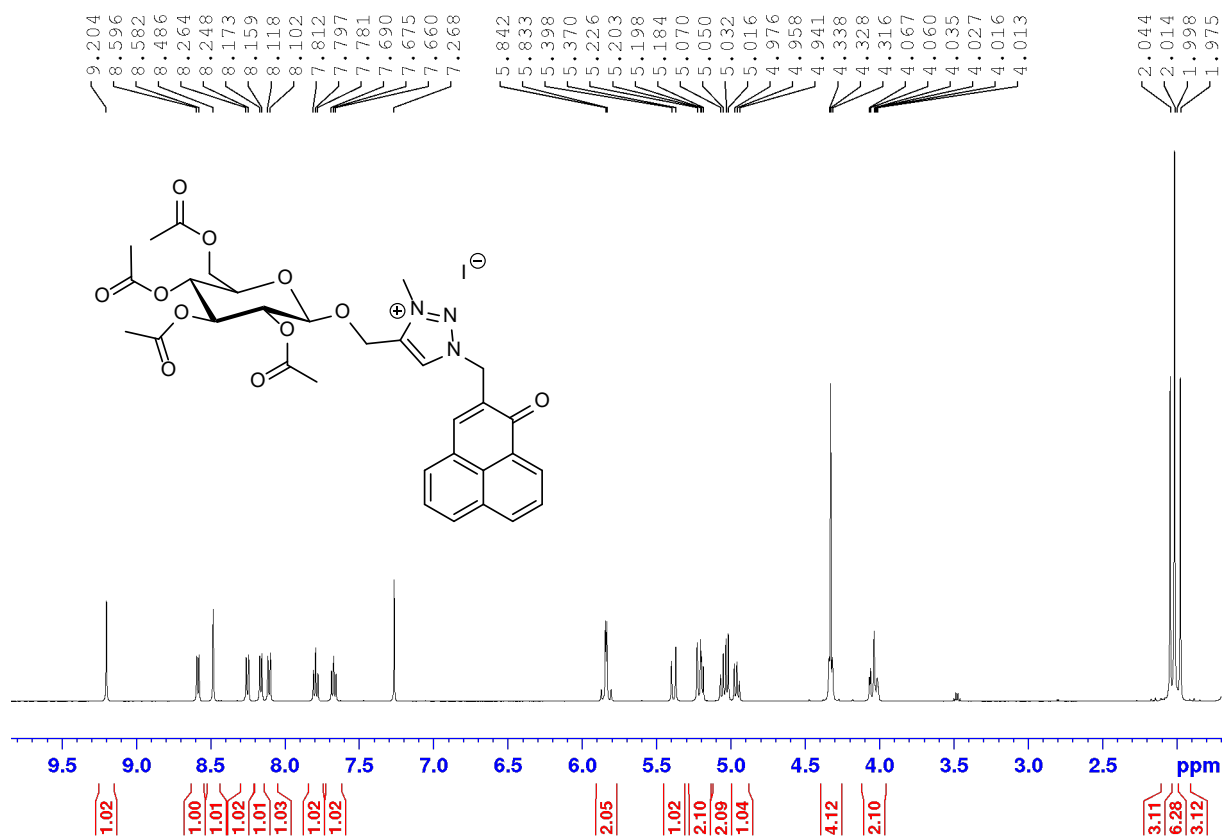

Figure S7. <sup>1</sup>H NMR of compound **4a** in CDCl<sub>3</sub>

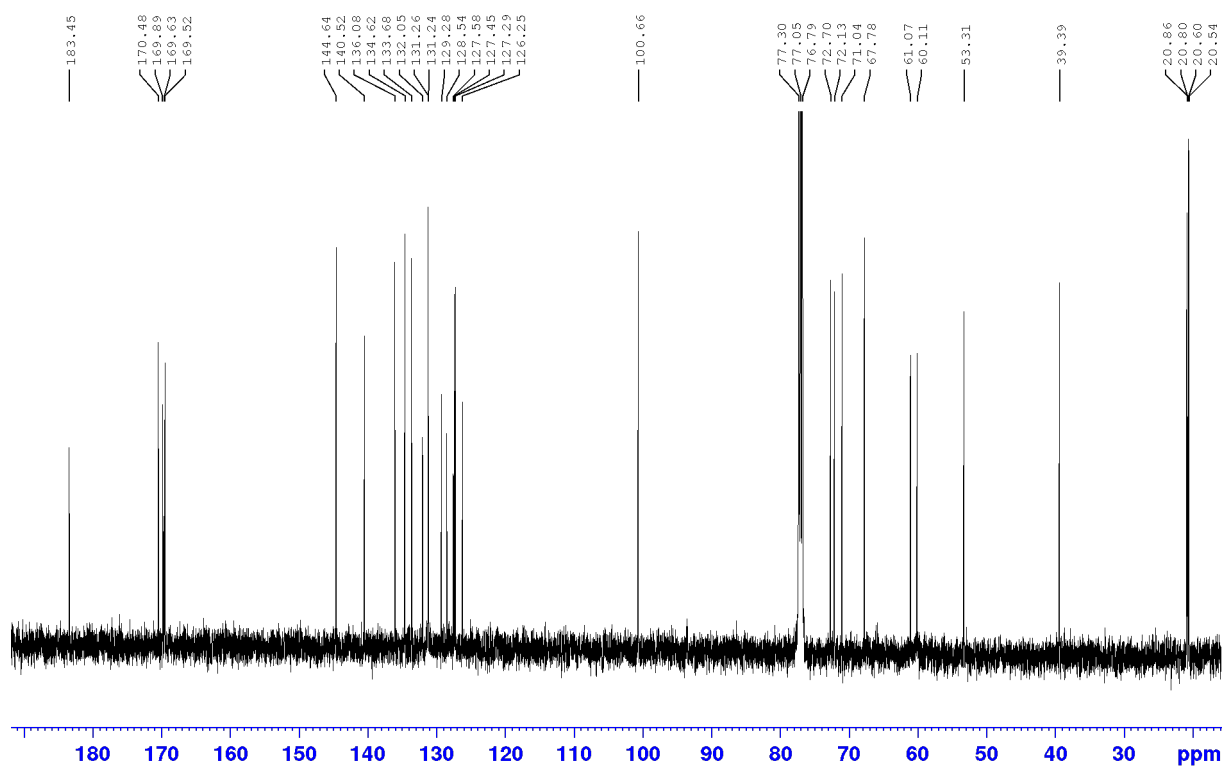

Figure S8. <sup>13</sup>C NMR of compound **4a** in CDCl<sub>3</sub>

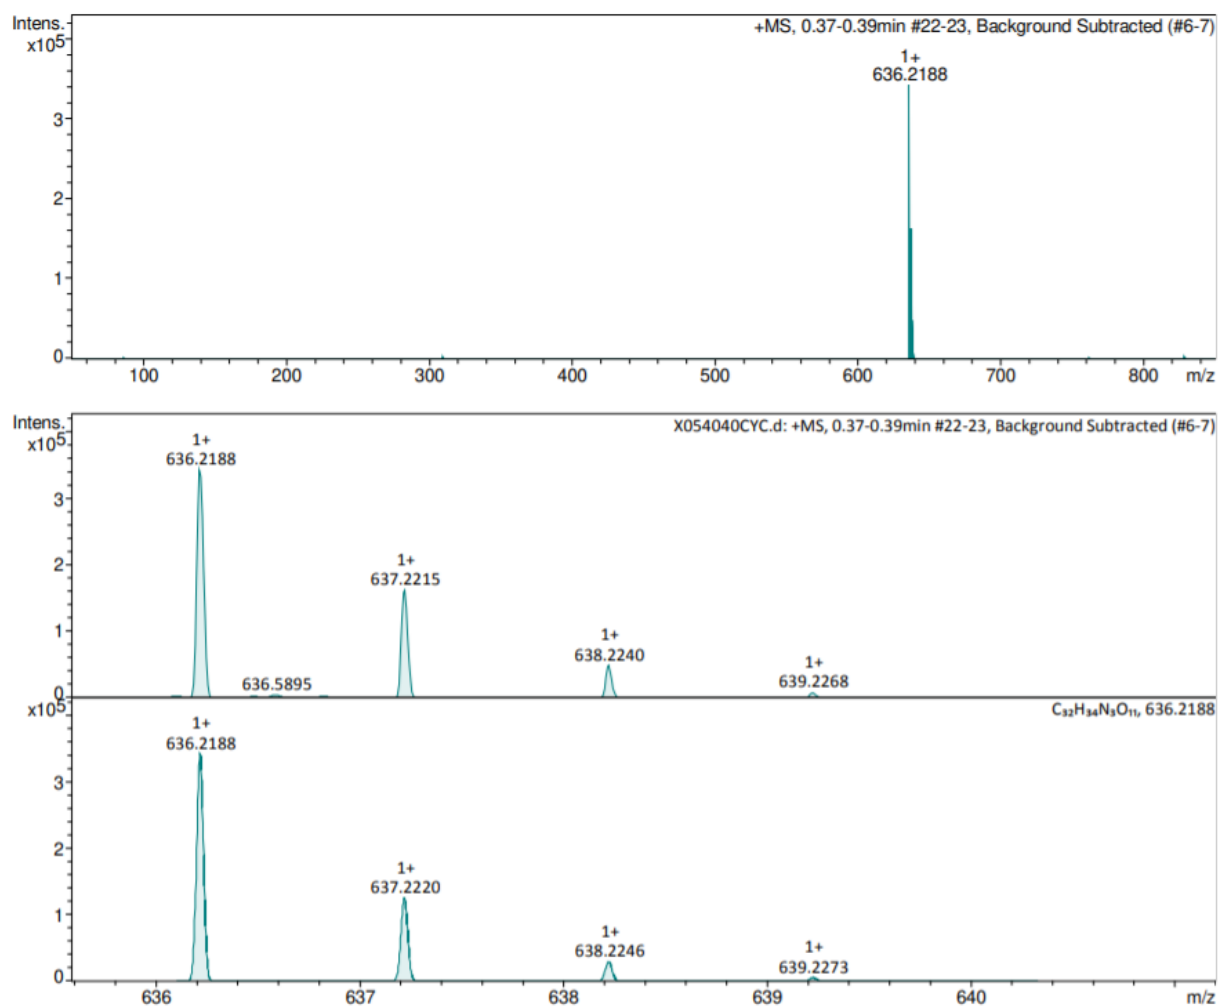

Figure S9. HRMS ESI<sup>+</sup> of compound 4a

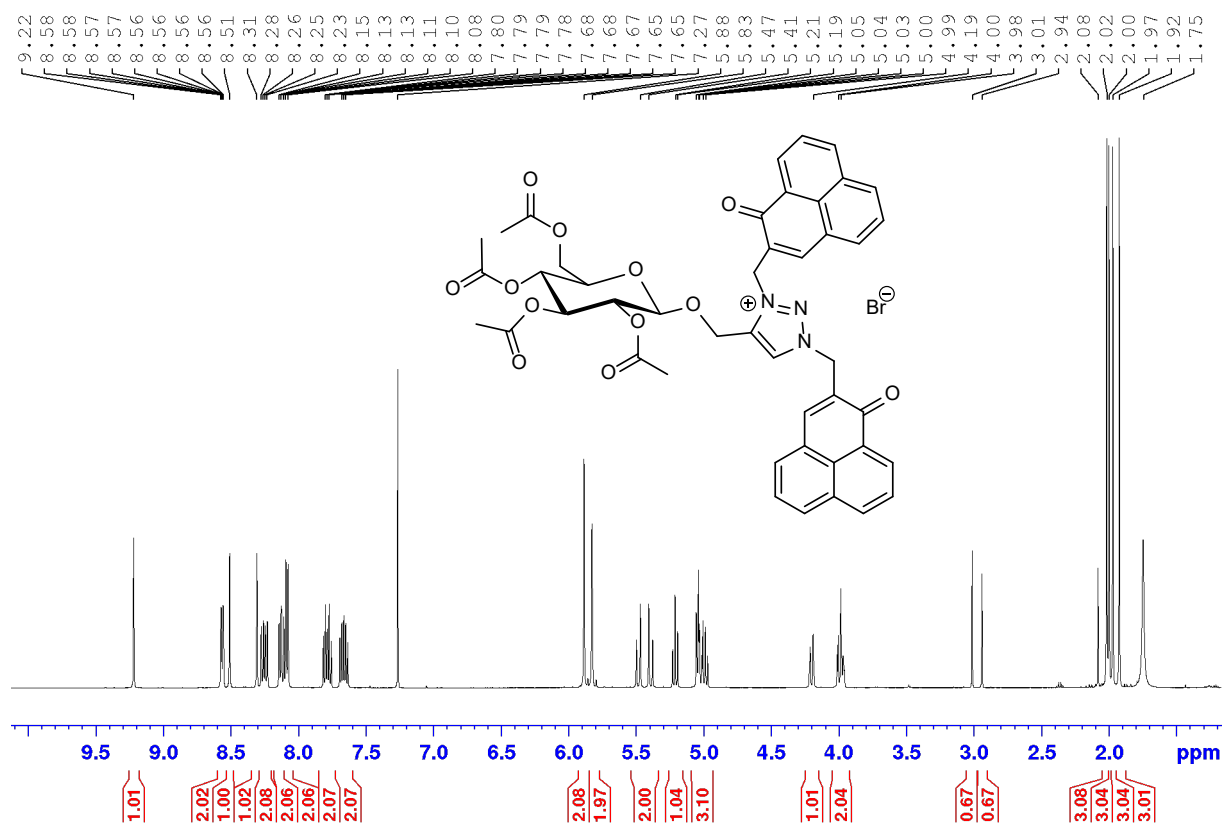

Figure S10. <sup>1</sup>H NMR of compound **4b** in CDCl<sub>3</sub>

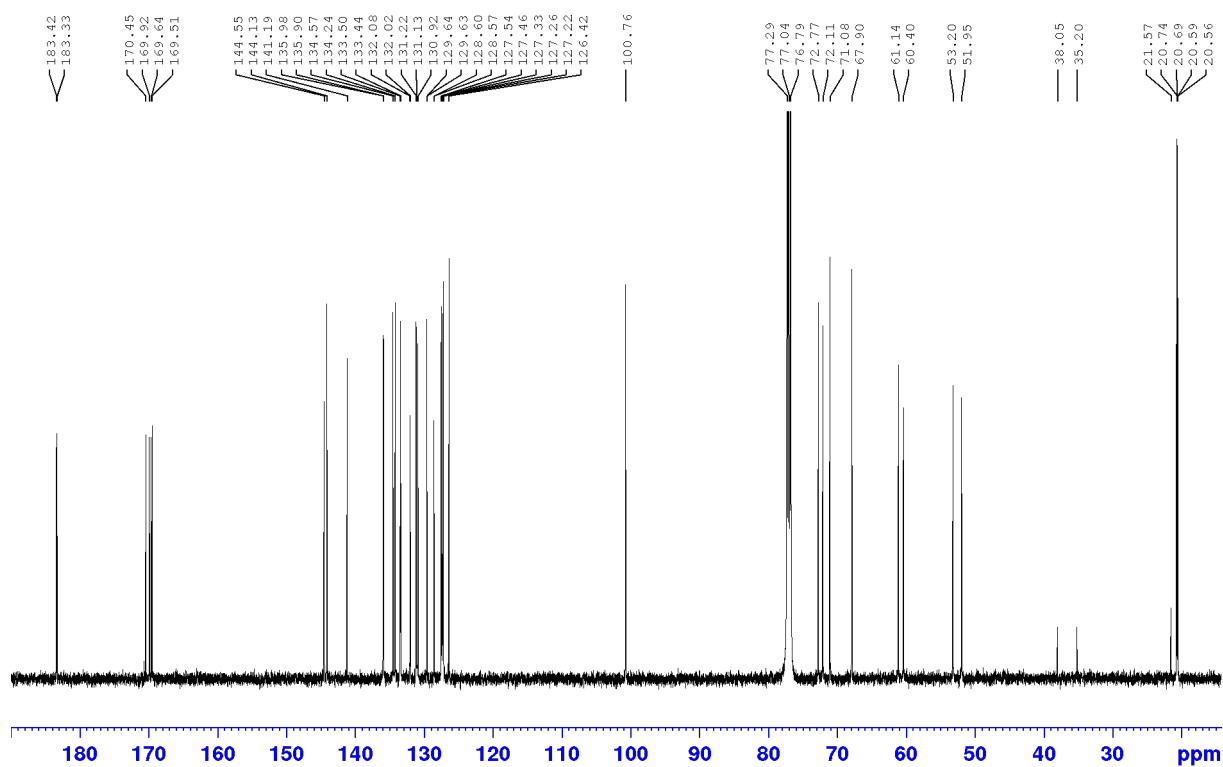

Figure S11. <sup>13</sup>C NMR of compound **4b** in CDCl<sub>3</sub>

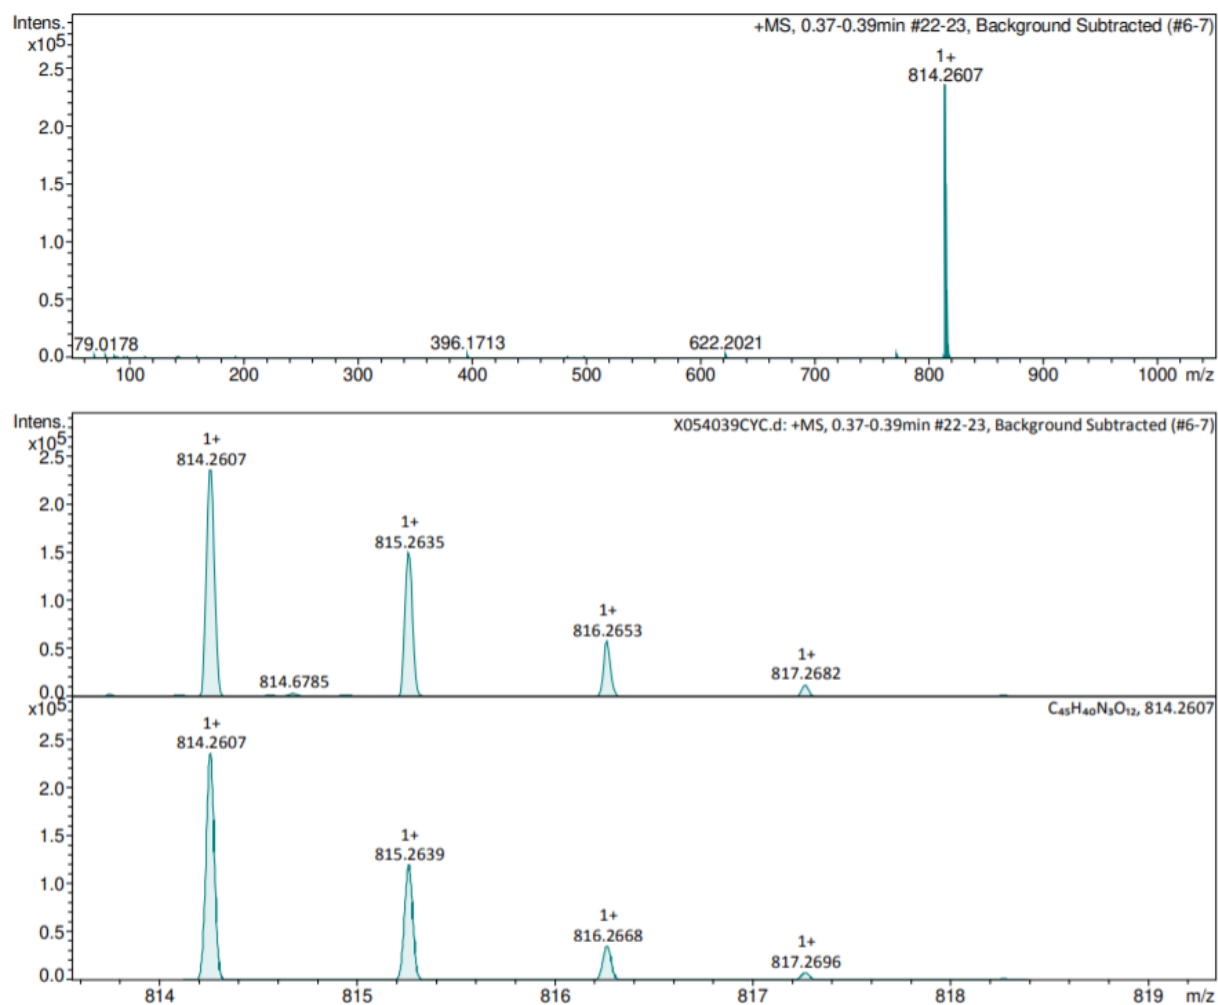

Figure S12. HRMS ESI<sup>+</sup> of compound **4b**



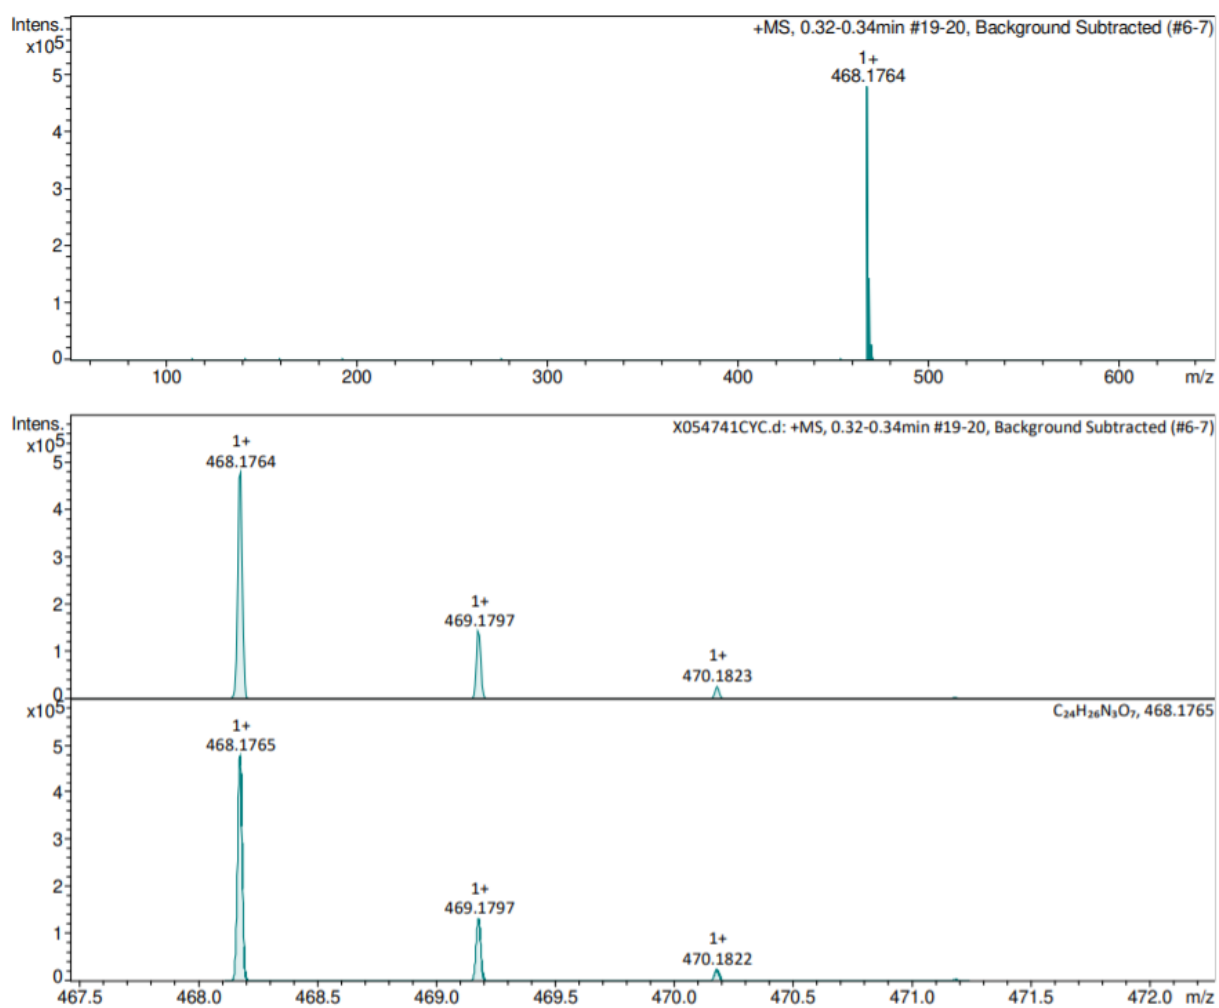

Figure S15. HRMS ESI<sup>+</sup> of compound 5a

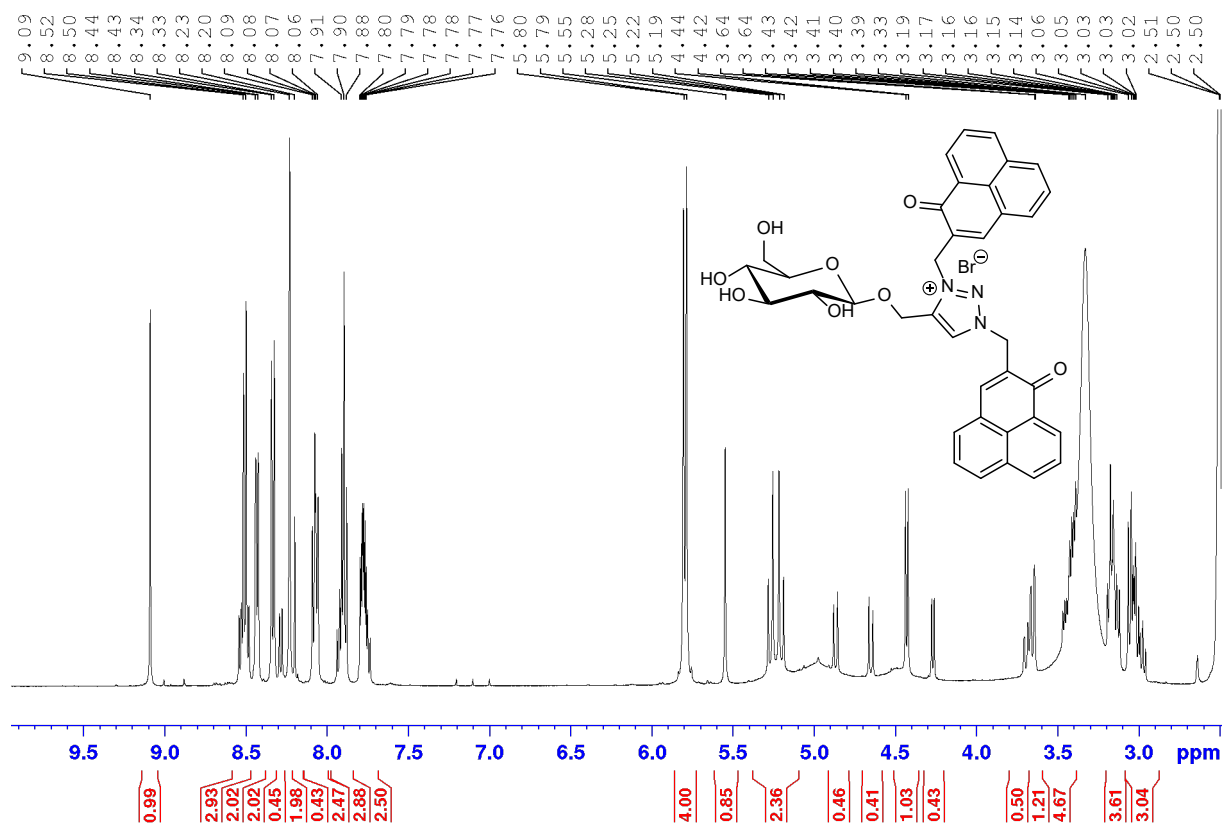

Figure S16. <sup>1</sup>H NMR of compound **5b** in D<sub>2</sub>O

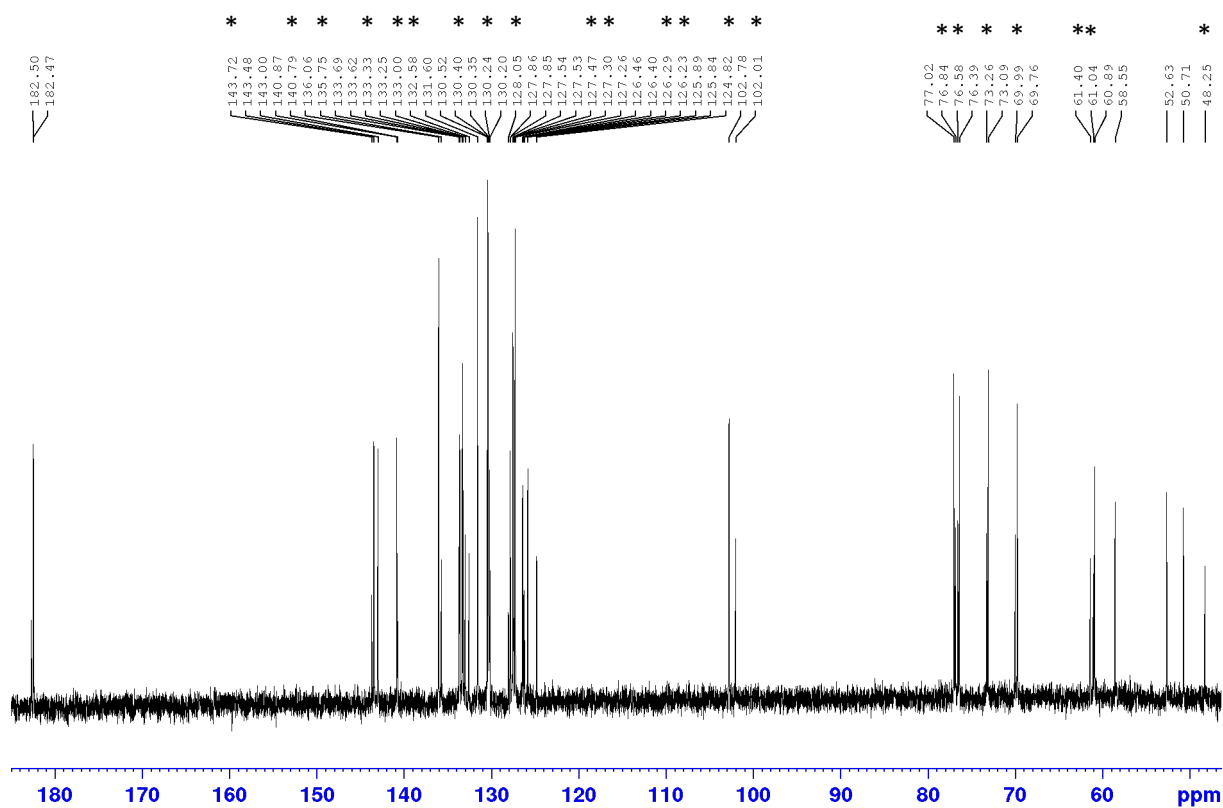

Figure S17. <sup>13</sup>C NMR of compound **5b** in D<sub>2</sub>O (\*contamination by compound **5**)

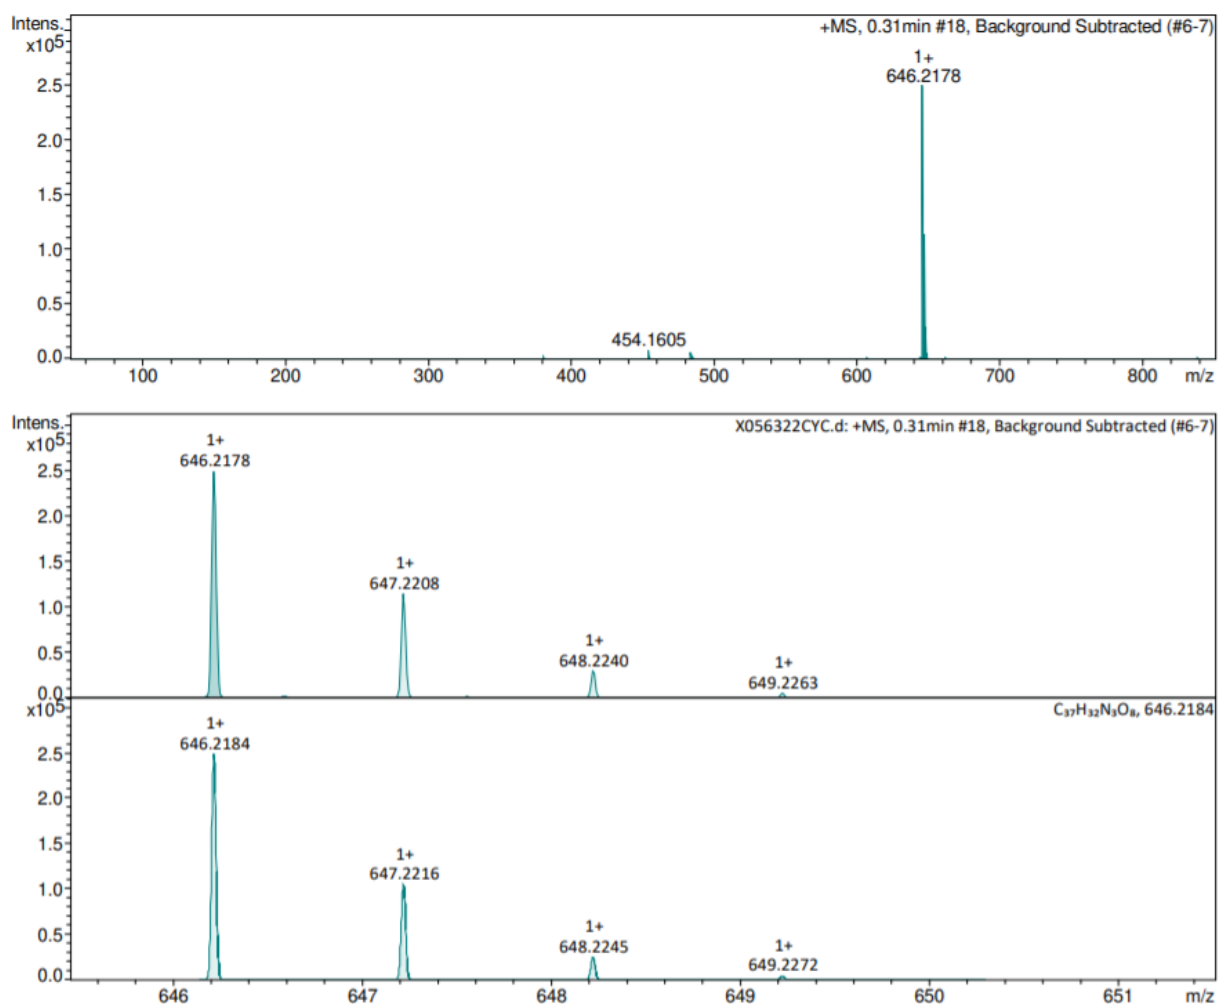

Figure S18. HRMS ESI<sup>+</sup> of compound **5b**

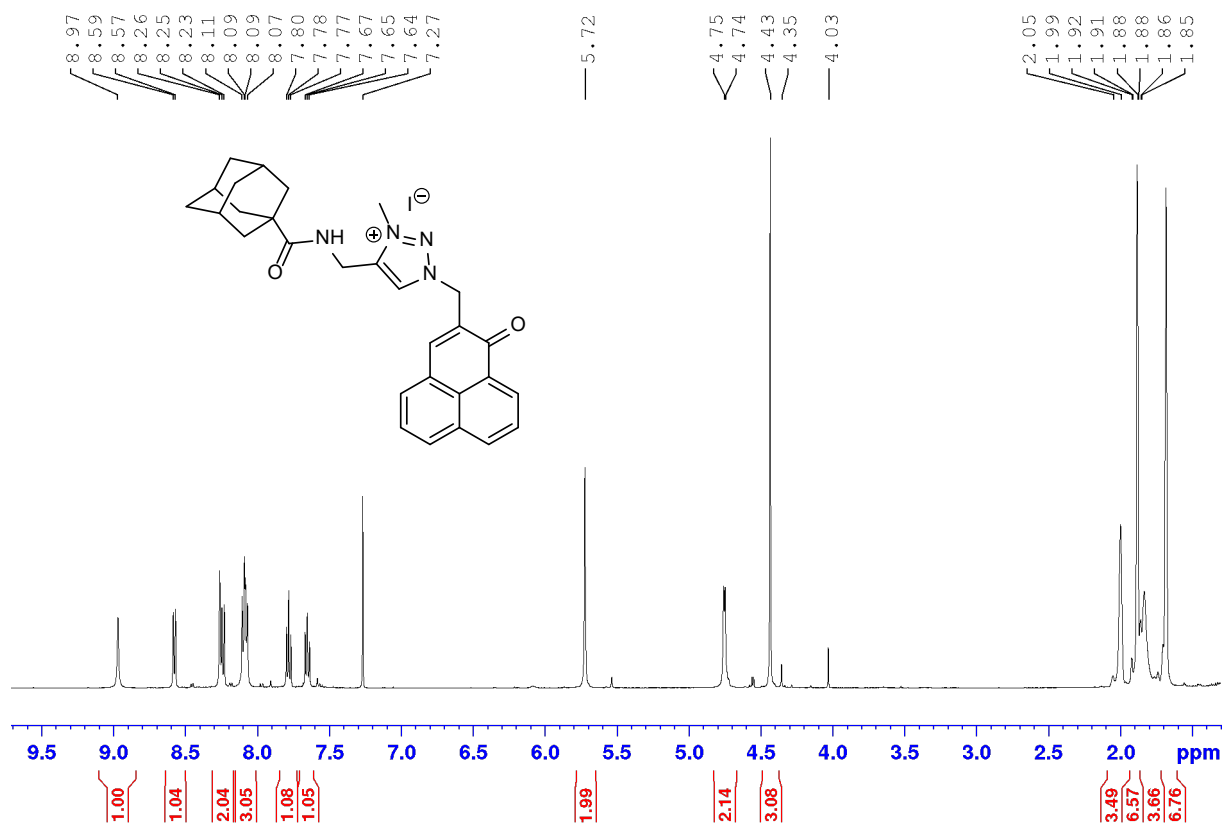

Figure S19. <sup>1</sup>H NMR of compound **6a** in CDCl<sub>3</sub>

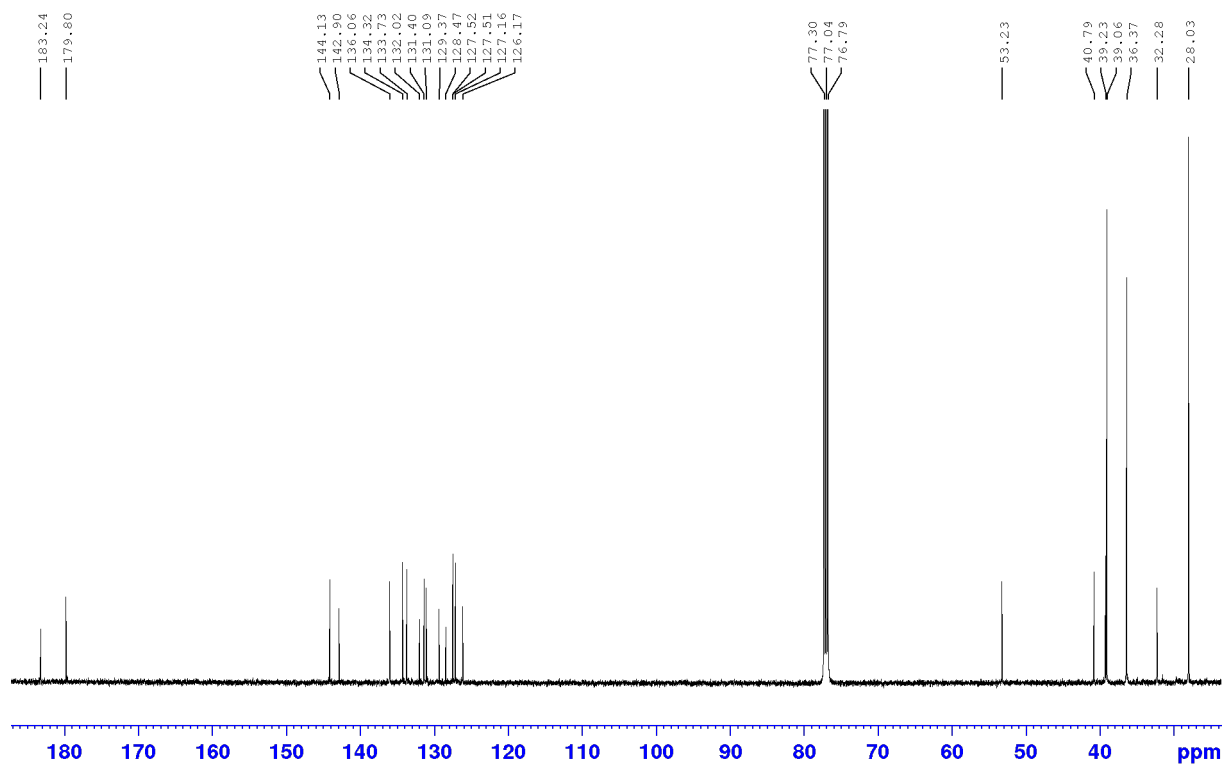

Figure S20. <sup>13</sup>C NMR of compound **6a** in CDCl<sub>3</sub>

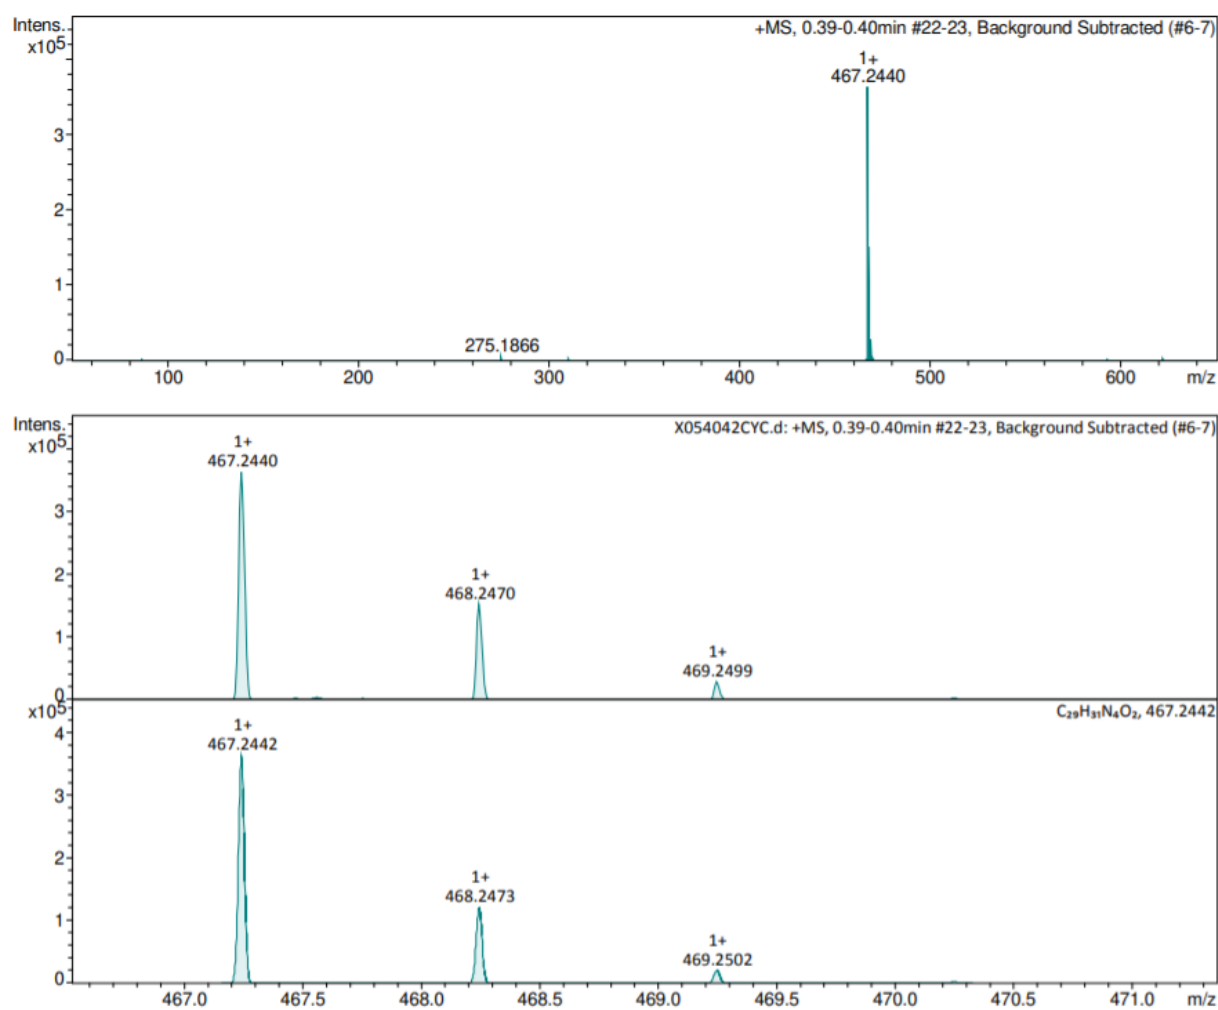

Figure S21. HRMS ESI<sup>+</sup> of compound 6a

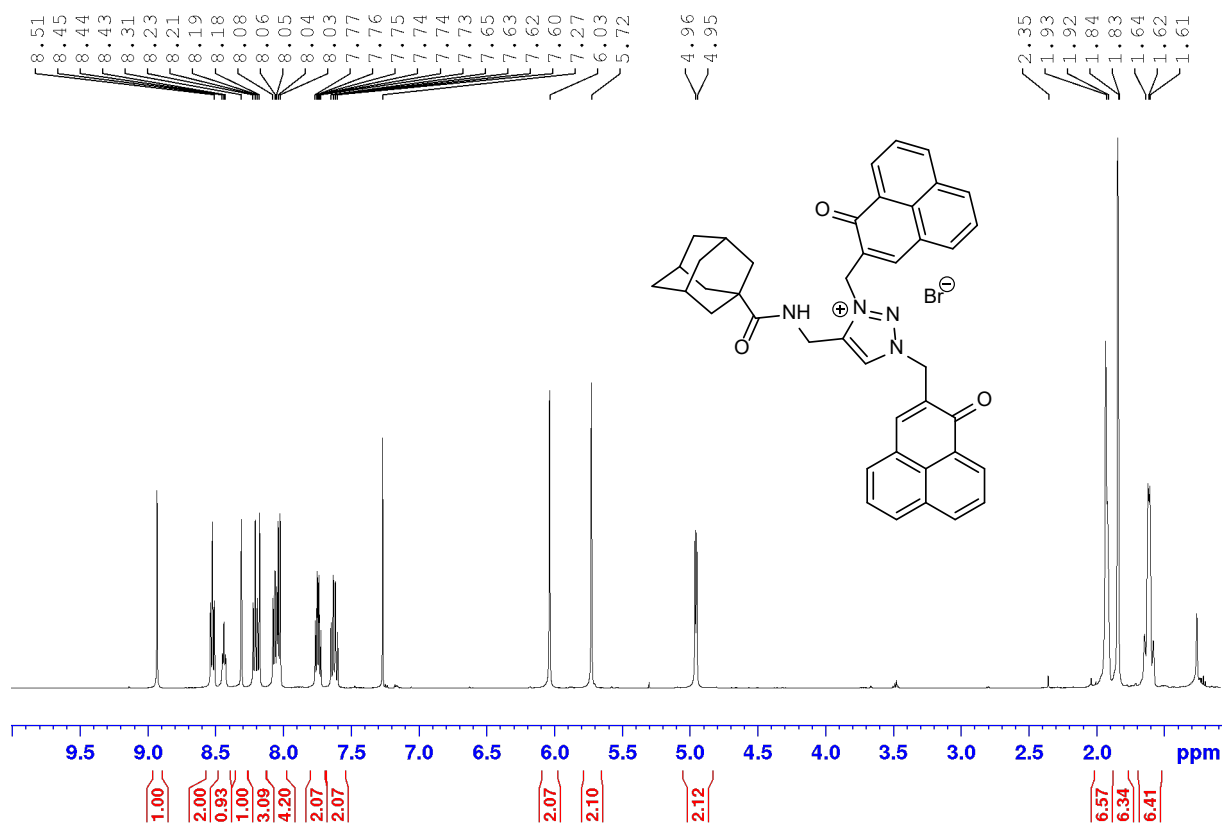

Figure S22. <sup>1</sup>H NMR of compound **6b** in CDCl<sub>3</sub>

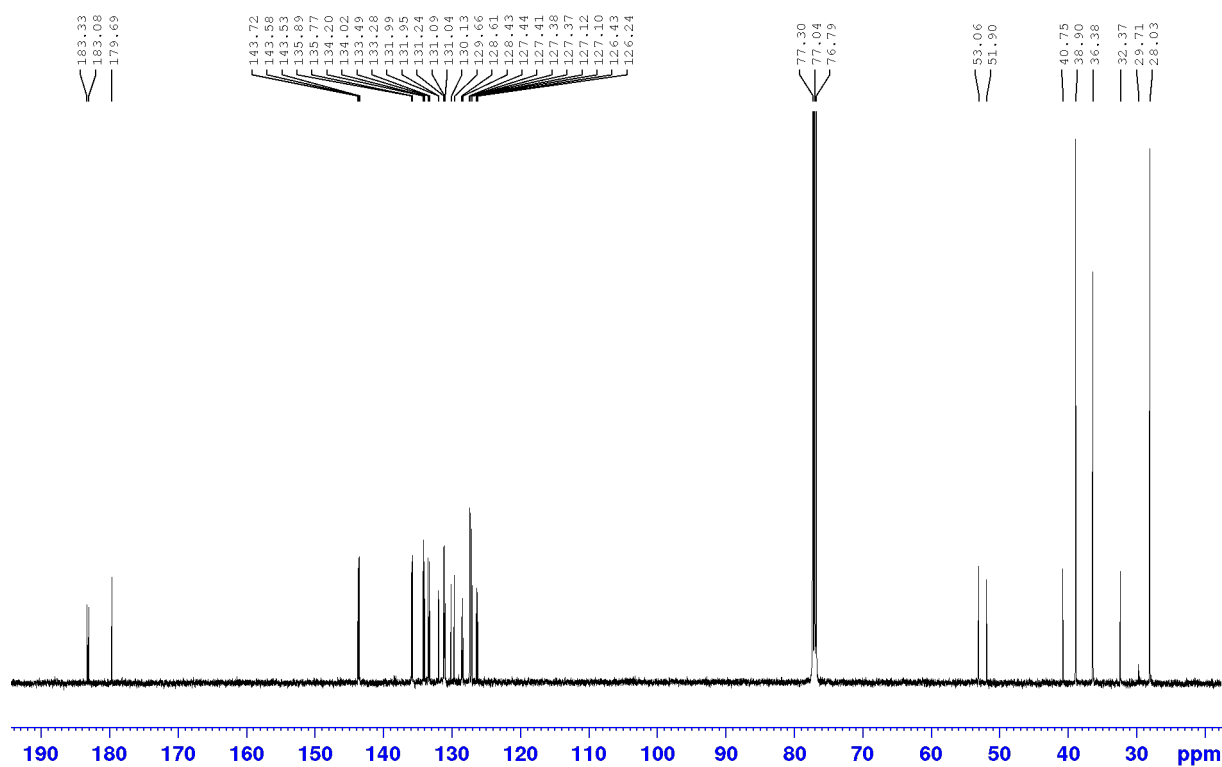

Figure S23. <sup>13</sup>C NMR of compound **6b** in CDCl<sub>3</sub>

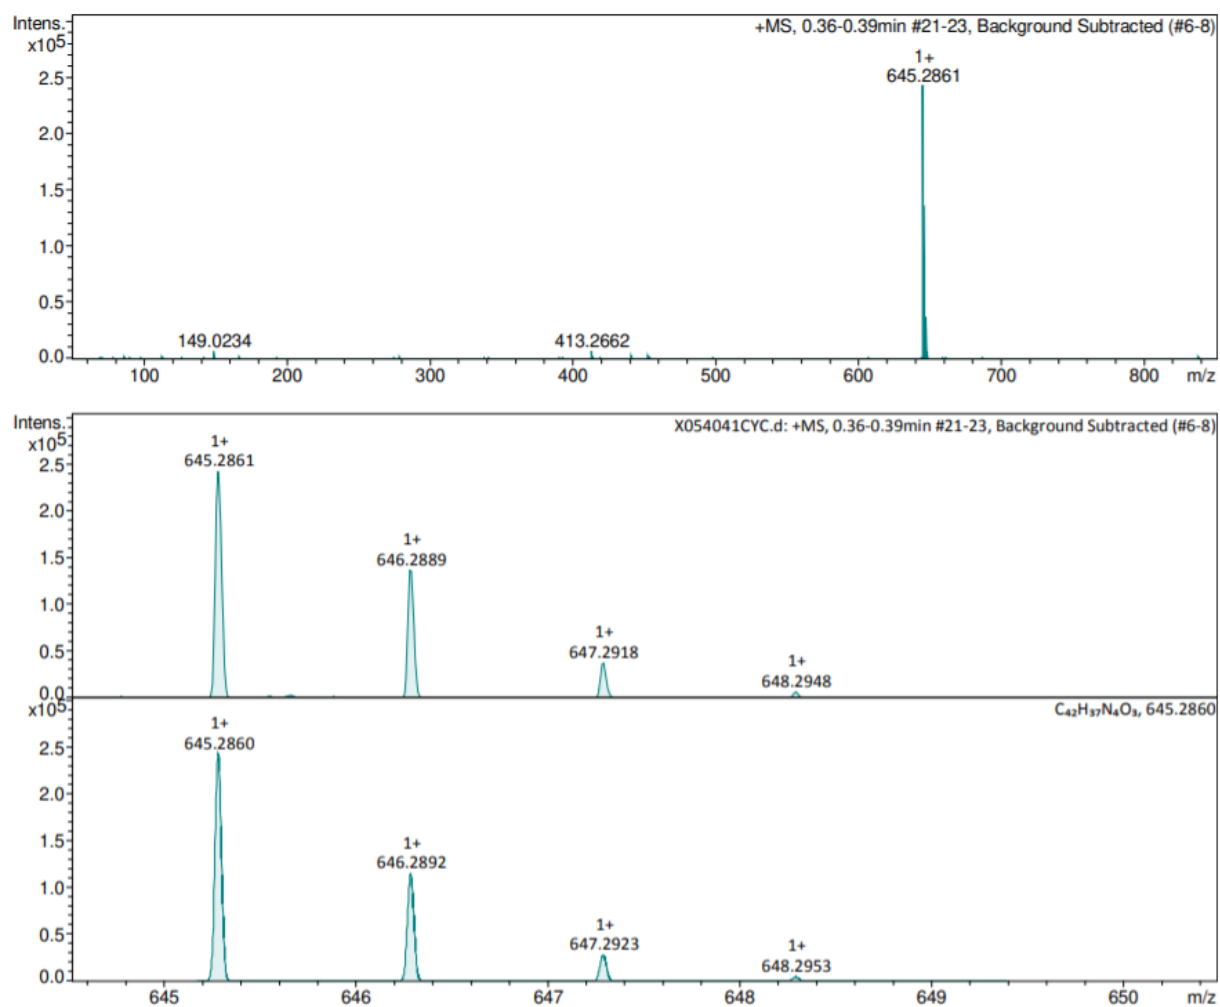

Figure S24. HRMS ESI<sup>+</sup> of compound **6b**

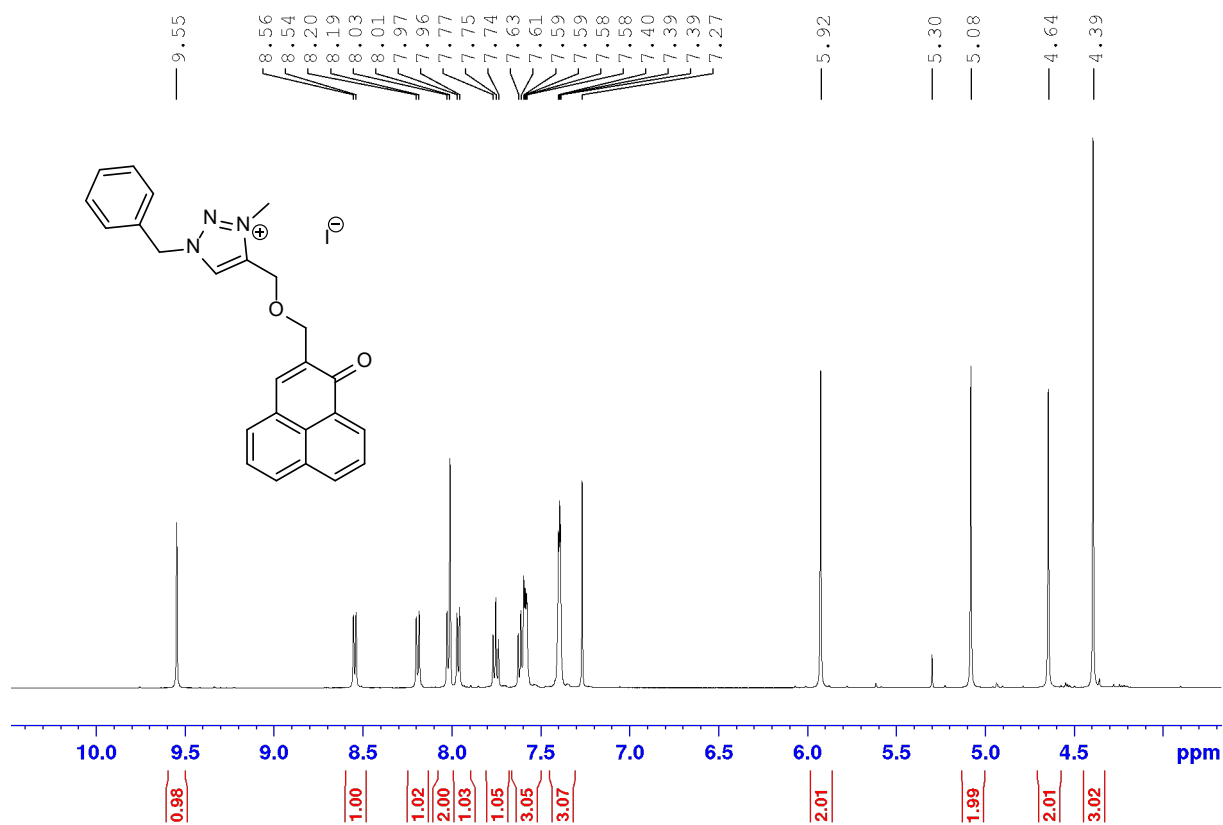

Figure S25. <sup>1</sup>H NMR of compound **7a** in CDCl<sub>3</sub>

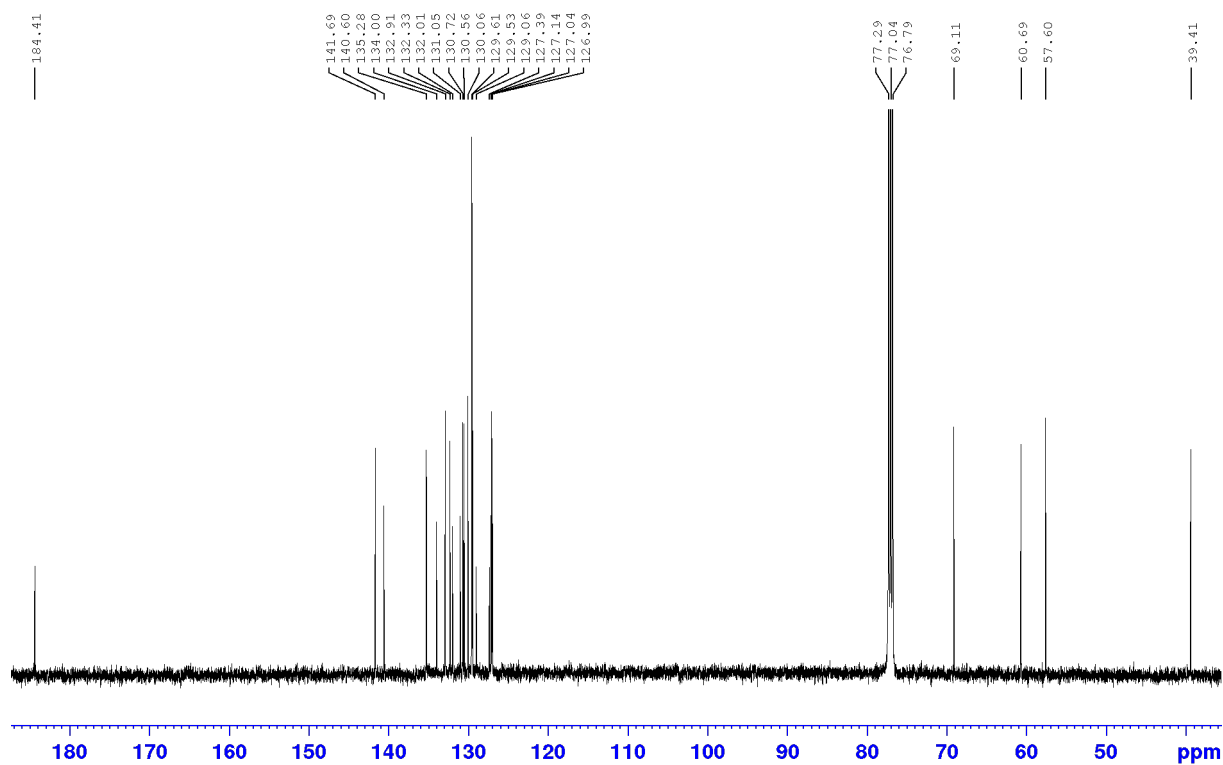

Figure S26. <sup>13</sup>C NMR of compound **7a** in CDCl<sub>3</sub>

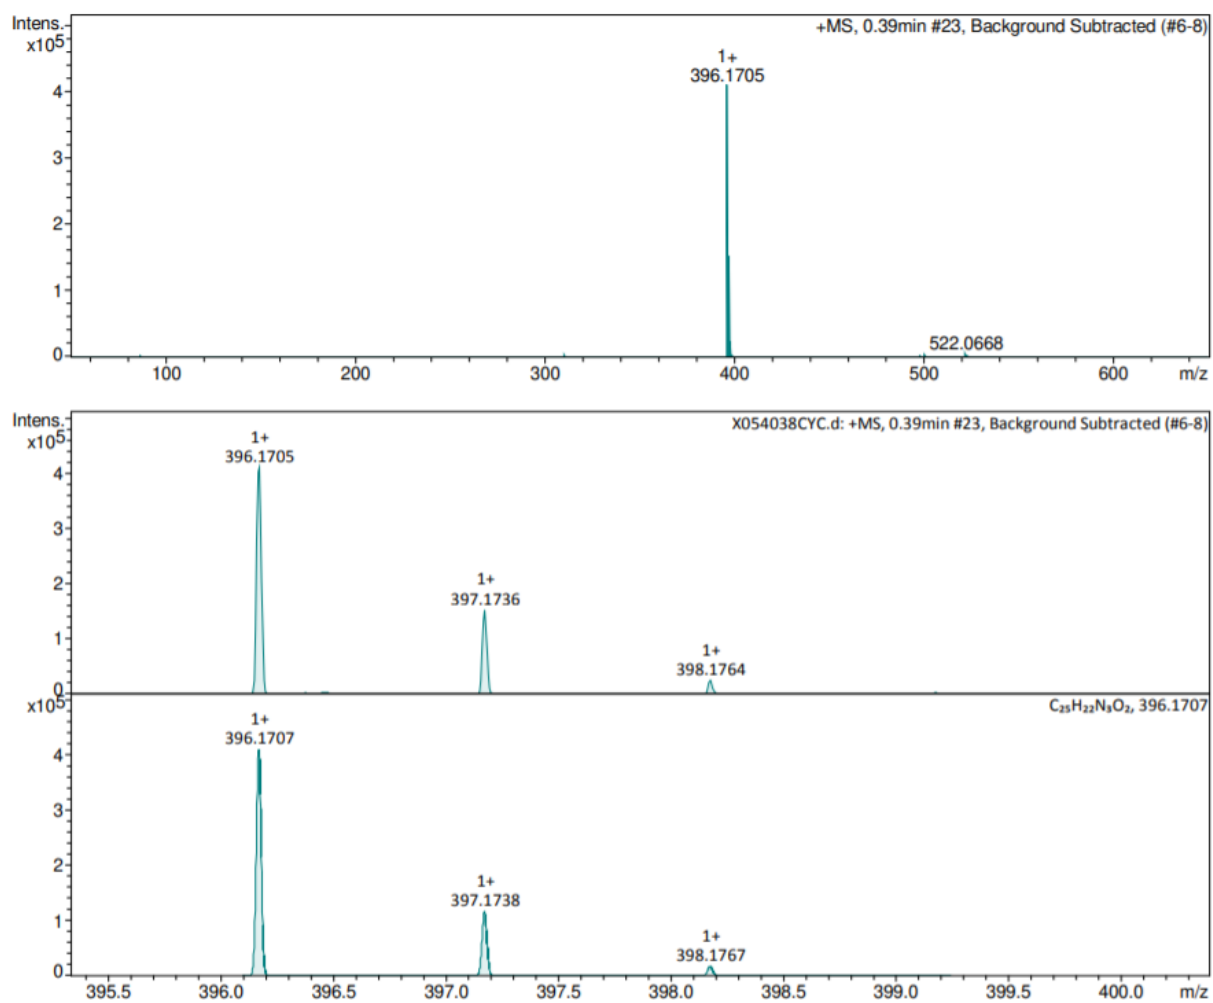

Figure S27. HRMS ESI<sup>+</sup> of compound **7a**

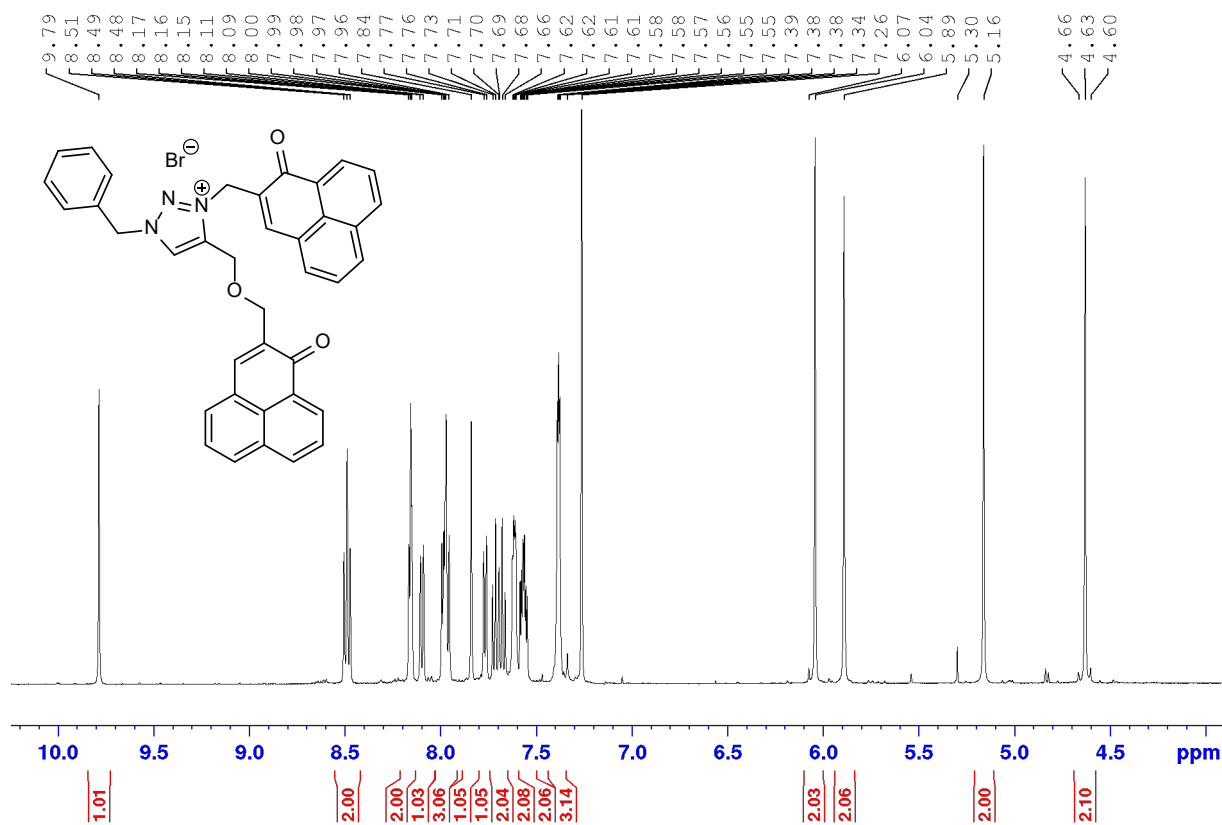

Figure S28. <sup>1</sup>H NMR of compound **7b** in CDCl<sub>3</sub>

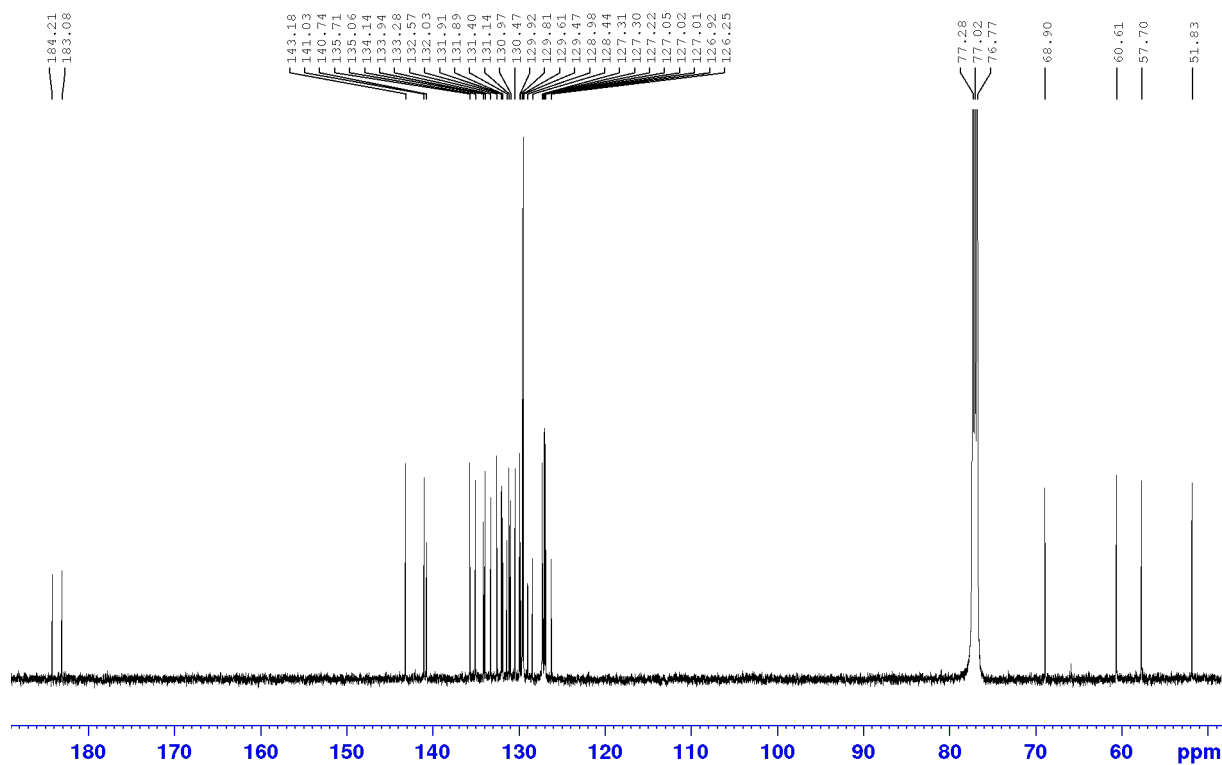

Figure S29. <sup>13</sup>C NMR of compound **7b** in CDCl<sub>3</sub>

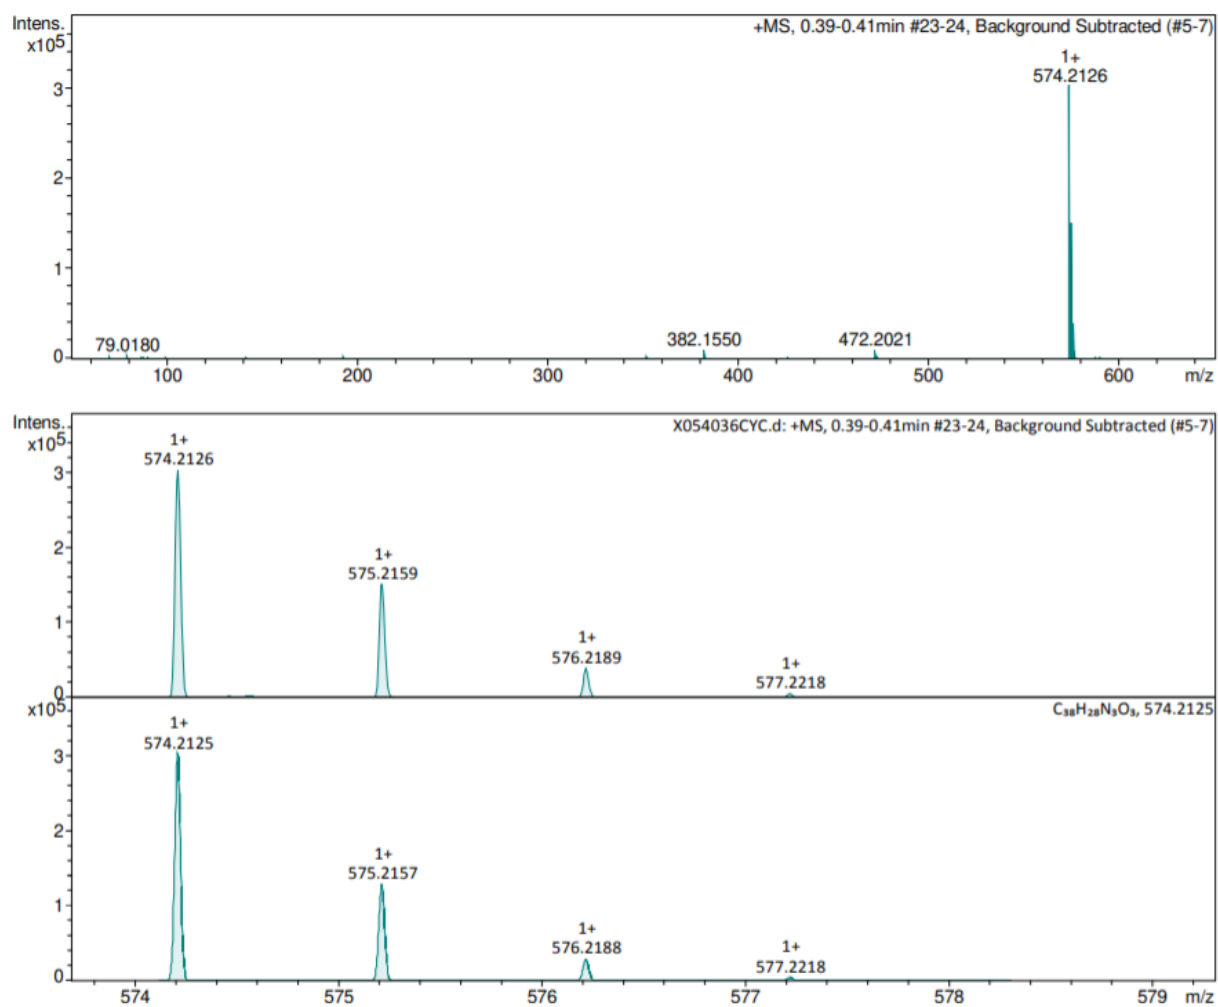

Figure S30. HRMS ESI<sup>+</sup> of compound **7b**

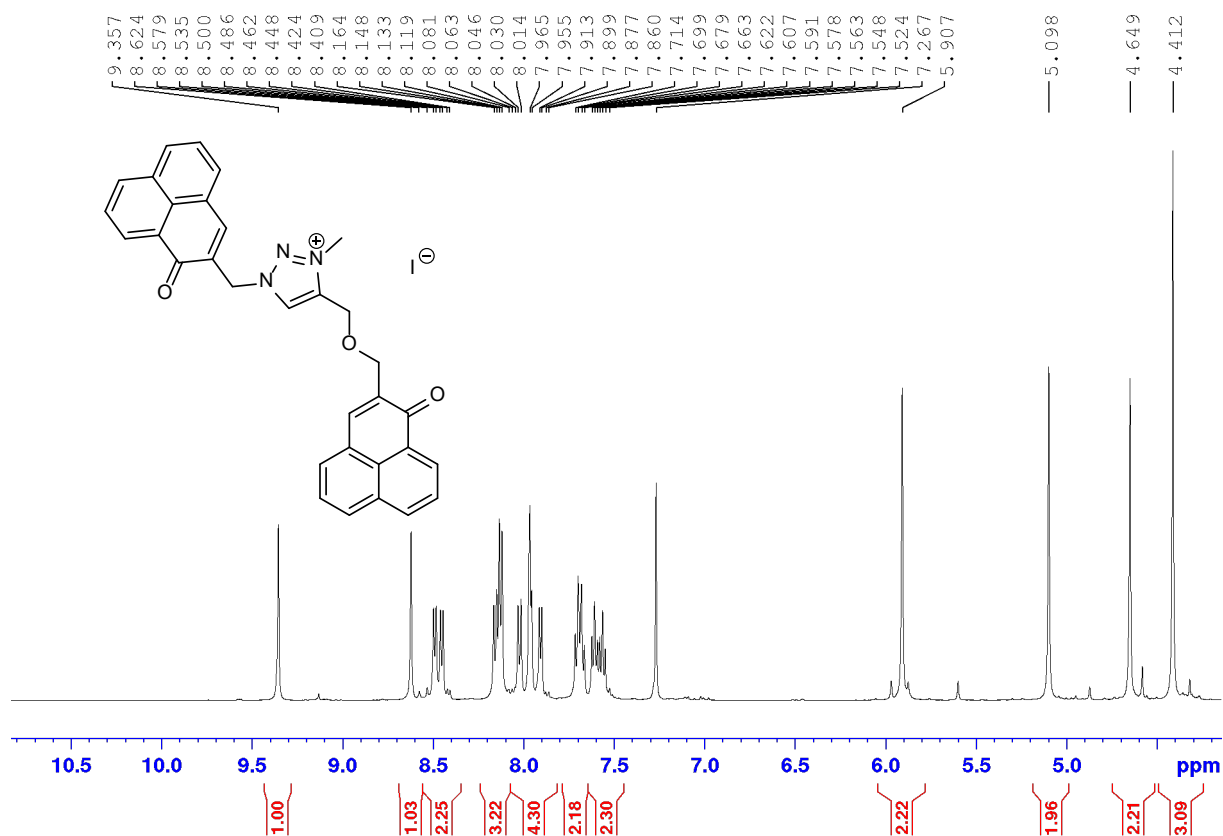

Figure S31. <sup>1</sup>H NMR of compound **8a** in CDCl<sub>3</sub>

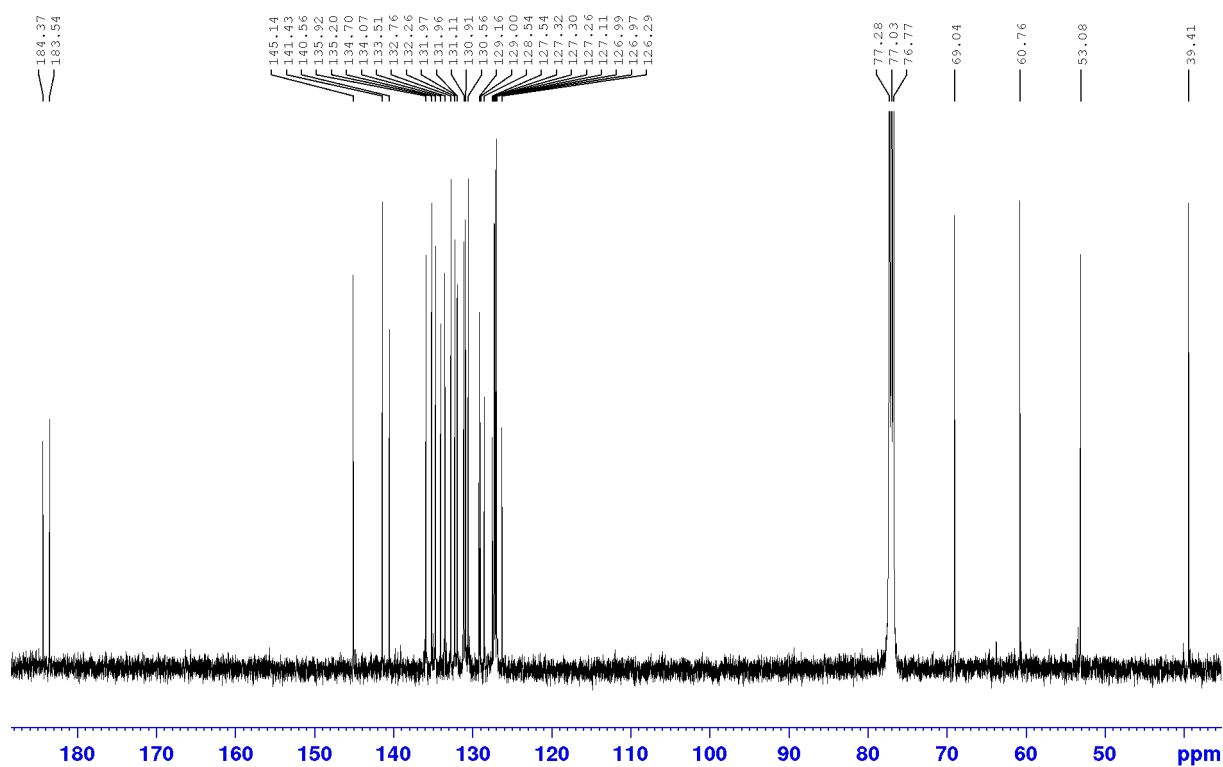

Figure S32. <sup>13</sup>C NMR of compound **8a** in CDCl<sub>3</sub>

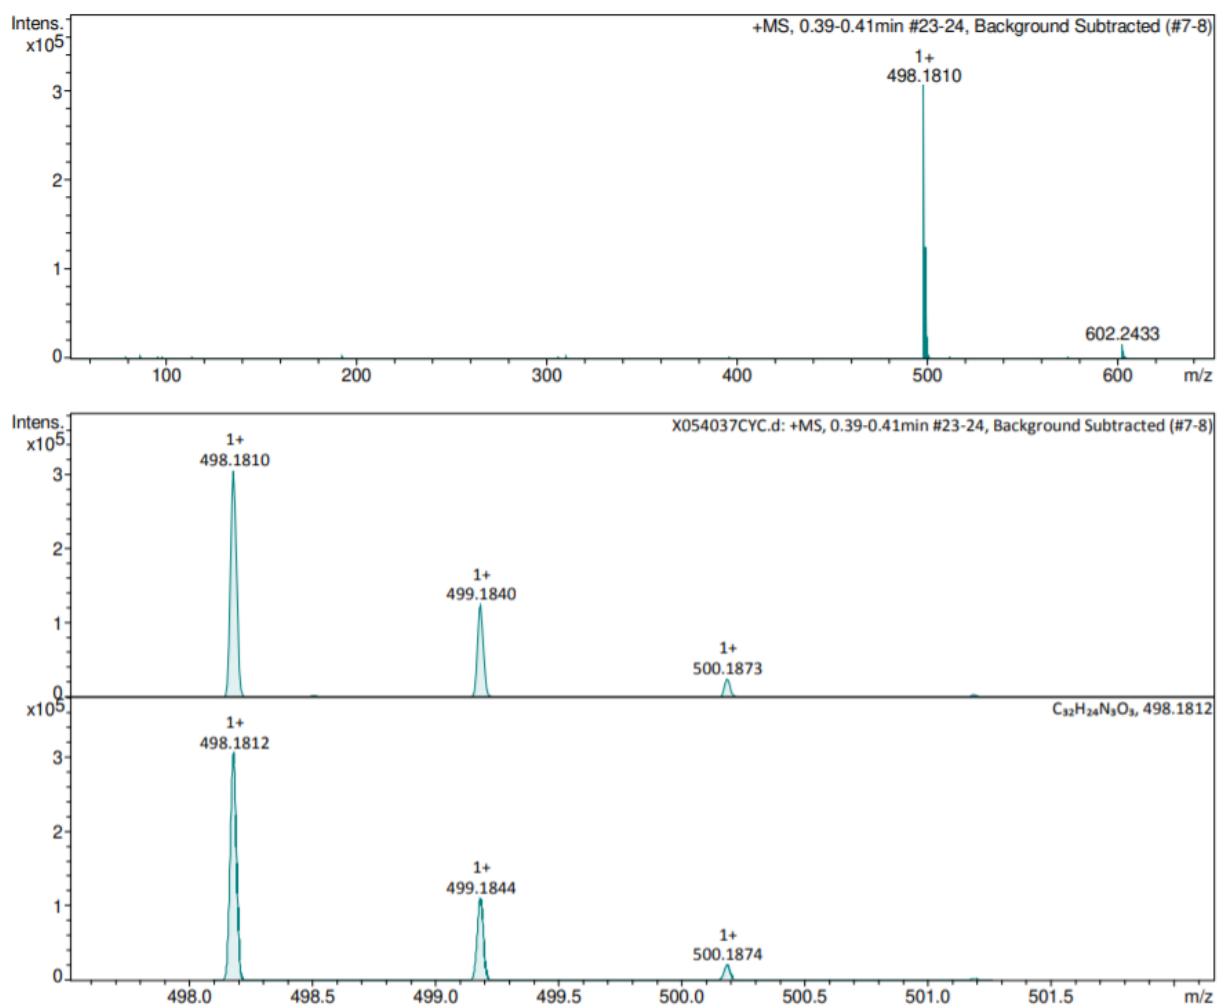

Figure S33. HRMS ESI<sup>+</sup> of compound **8a**

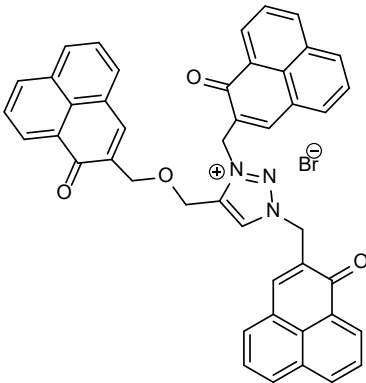

183.94  
183.65  
183.05

145.53  
142.86  
140.77  
139.89  
135.77  
135.48  
134.88  
134.64  
134.33  
134.10  
133.33  
133.11  
132.23  
131.97  
131.78  
131.74  
130.99  
130.97  
130.93  
130.34  
130.06  
129.50  
128.79  
128.65  
128.34  
127.55  
127.26  
127.16  
127.03  
126.98  
126.97  
126.91  
126.78  
126.48  
126.33

77.28  
77.03  
76.78

68.64  
60.84  
53.33  
51.44

ppm

Figure S35.  $^{13}\text{C}$  NMR of compound **8b** in  $\text{CDCl}_3$

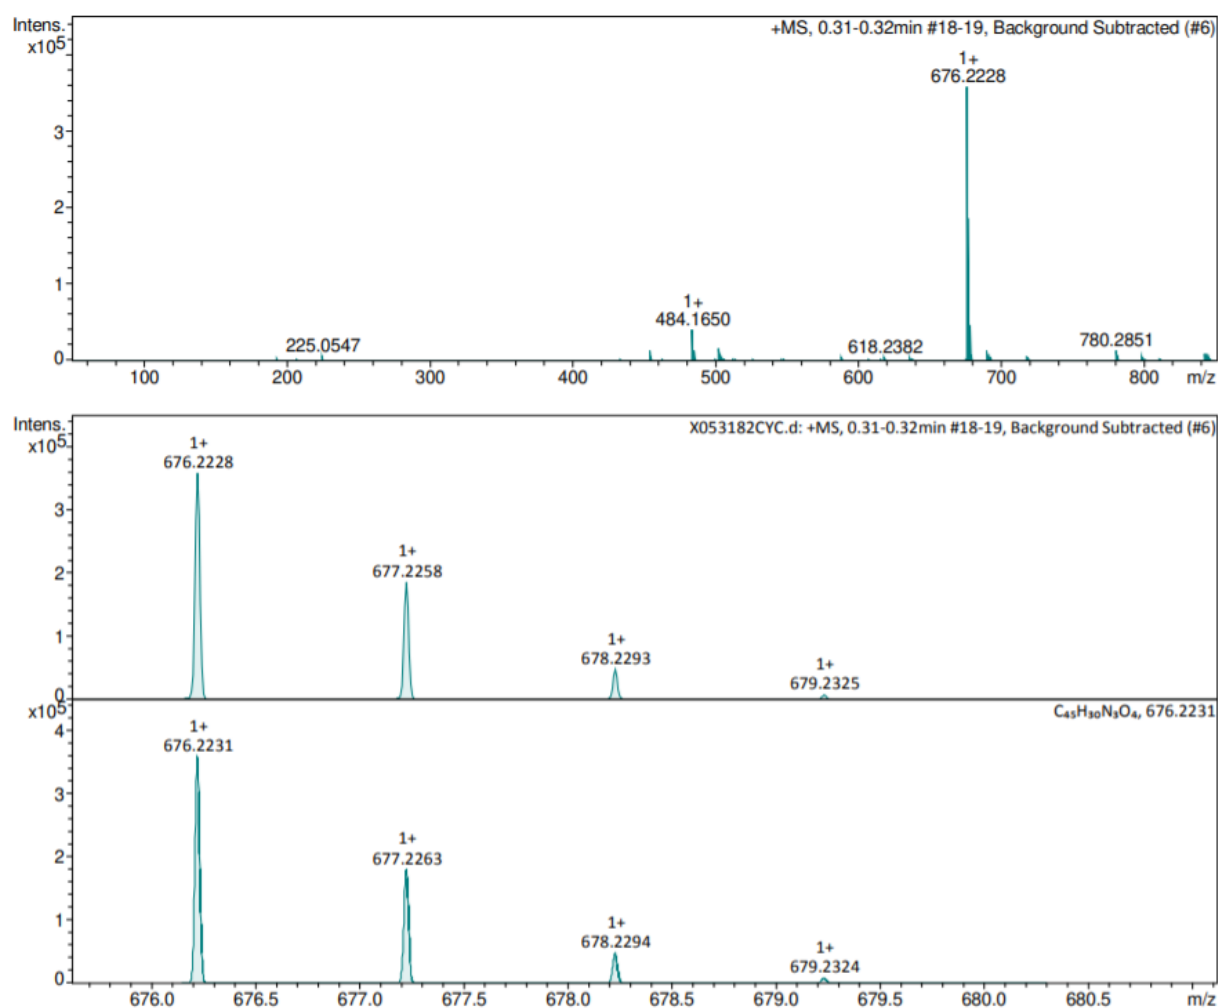

Figure S36. HRMS ESI<sup>+</sup> of compound **8b**

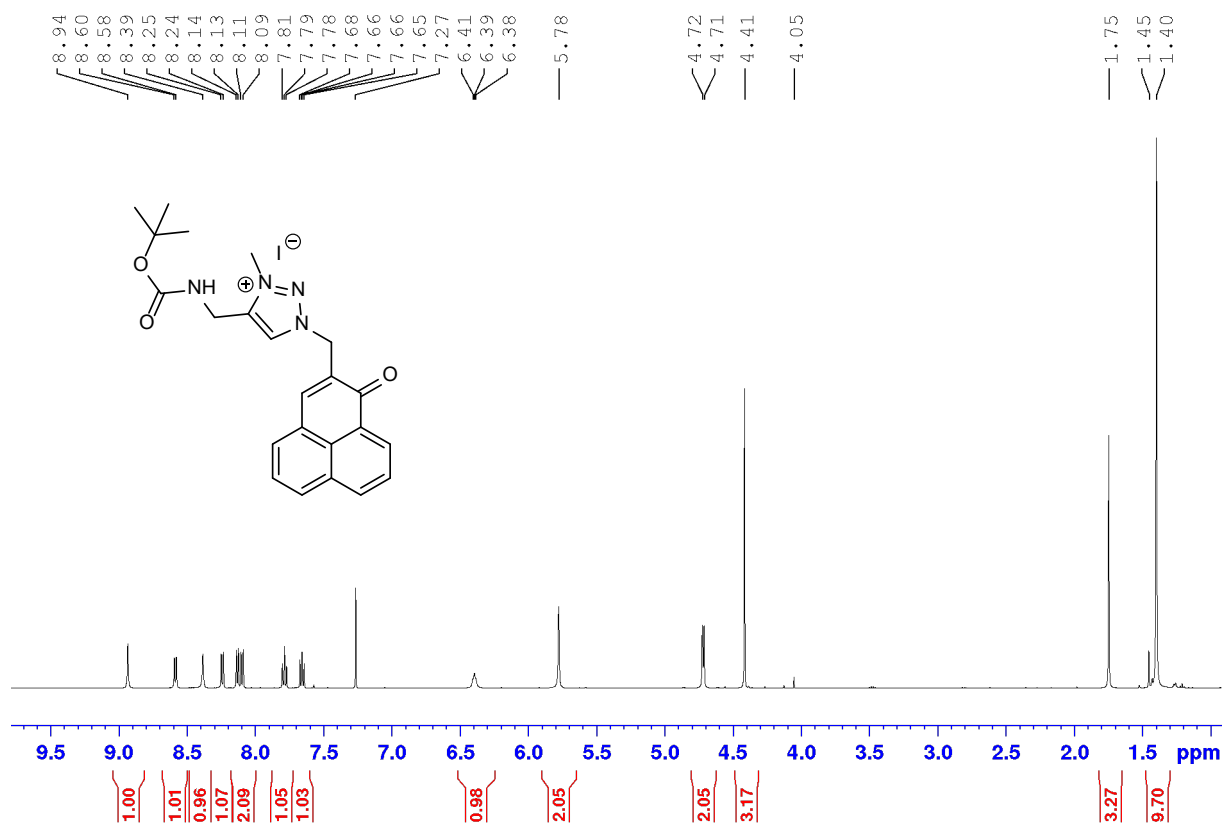

Figure S37. <sup>1</sup>H NMR of compound **9a** in CDCl<sub>3</sub>

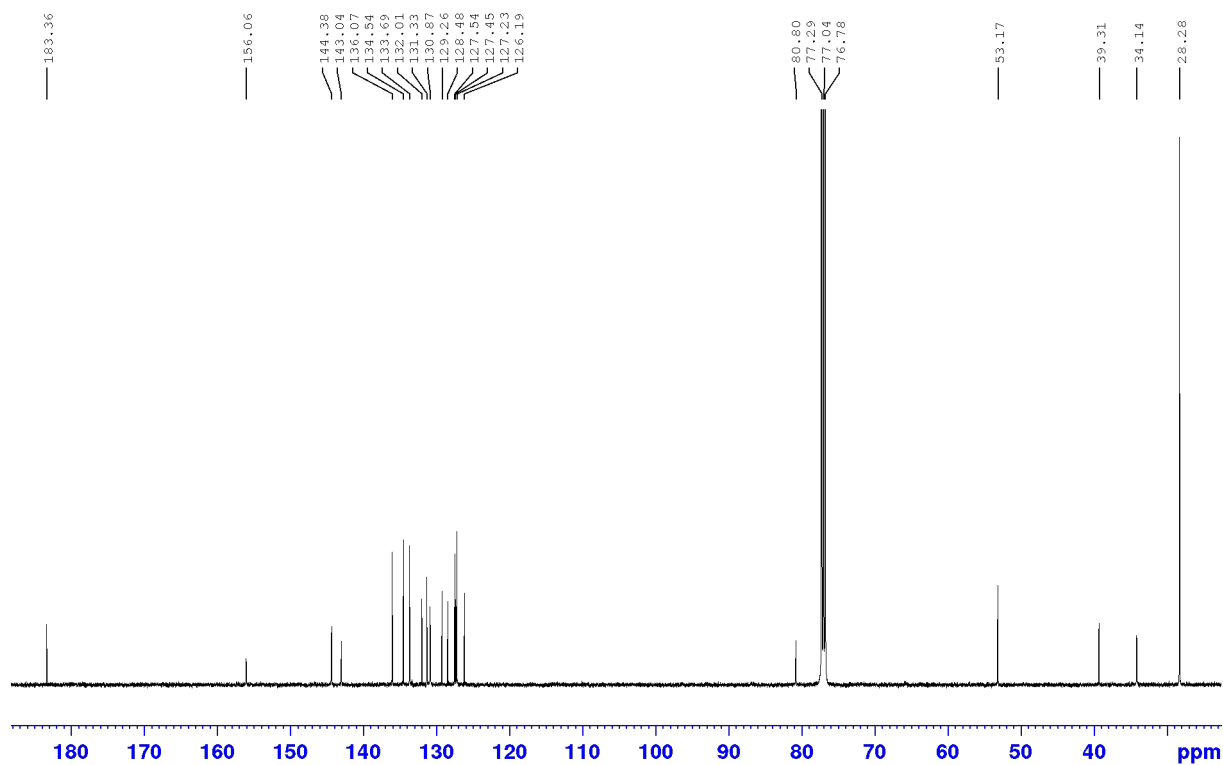

Figure S38. <sup>13</sup>C NMR of compound **9a** in CDCl<sub>3</sub>

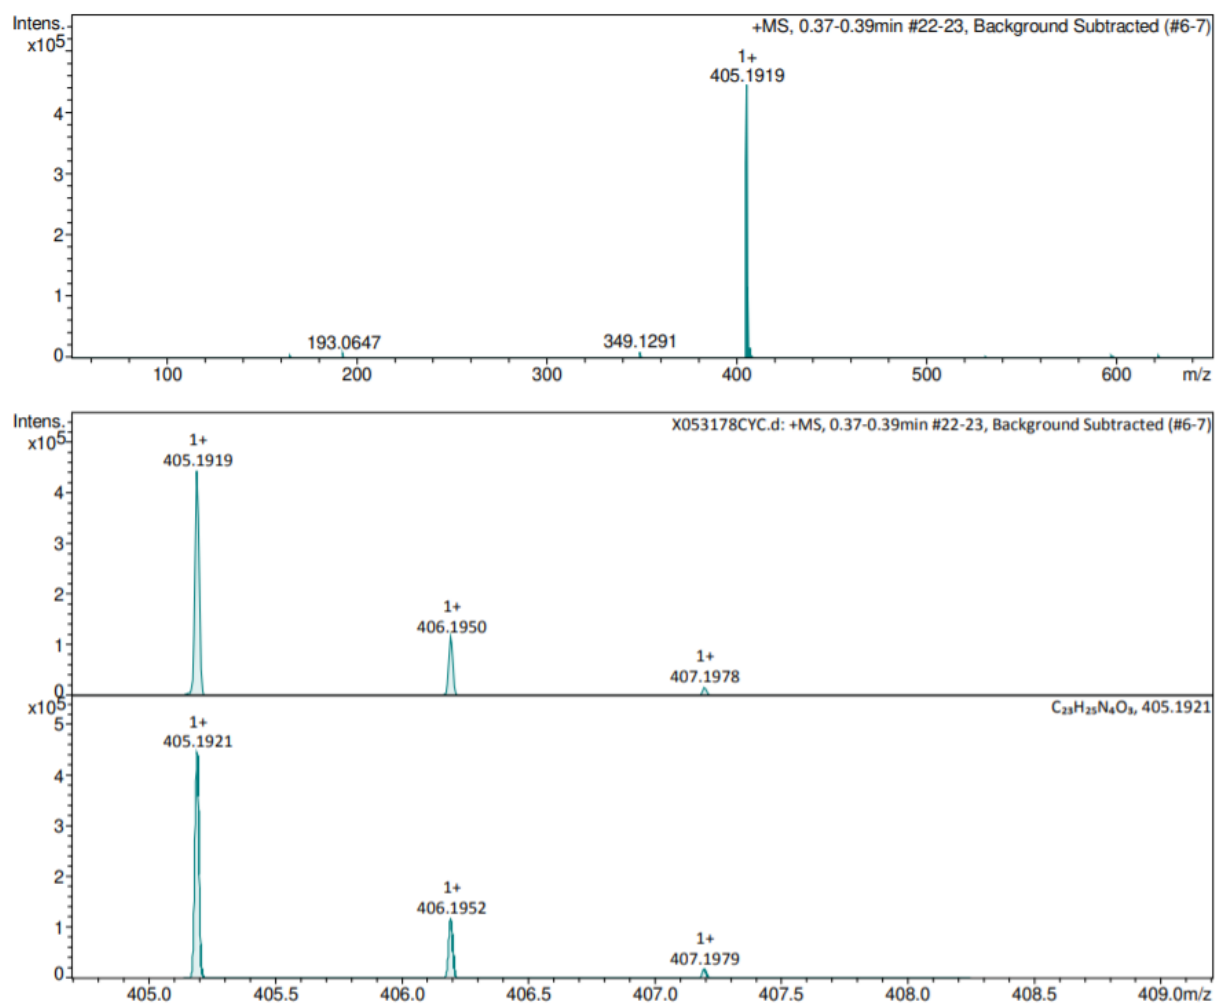

Figure S39. HRMS ESI<sup>+</sup> of compound **9a**

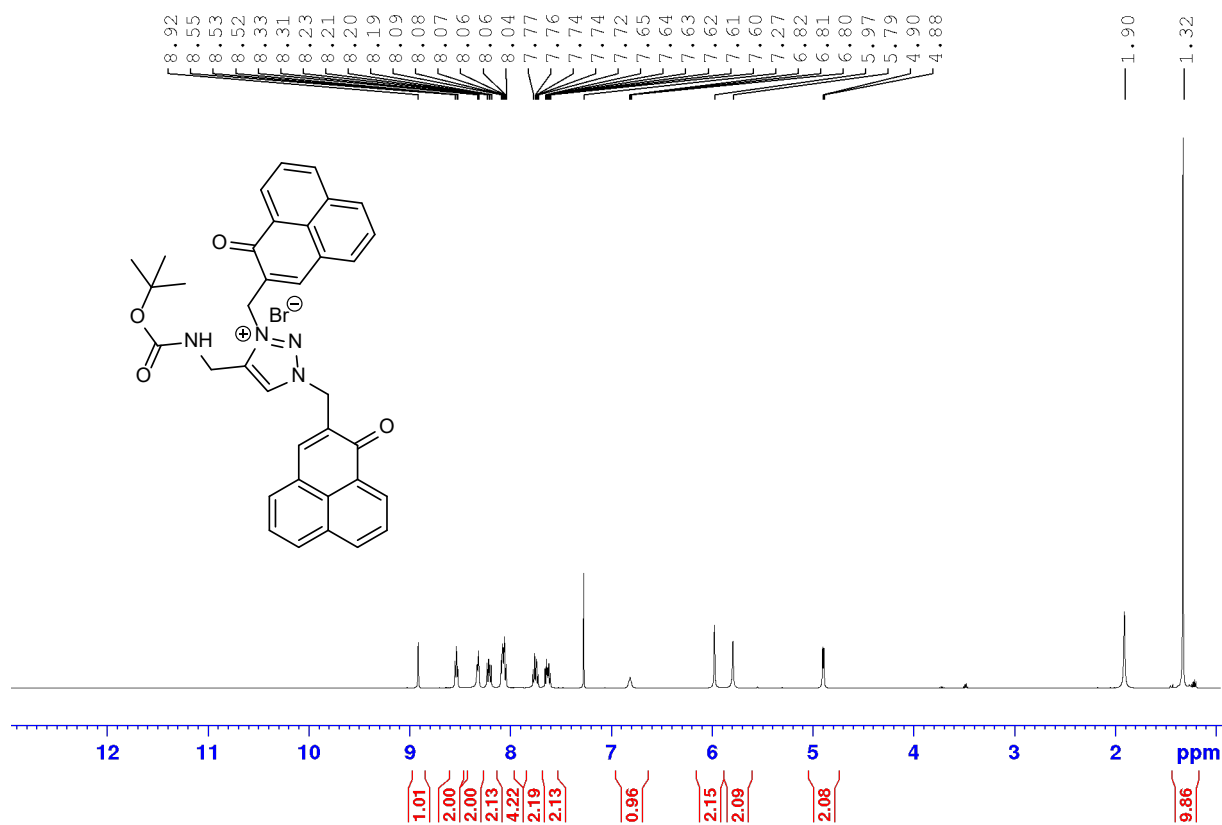

Figure S40. <sup>1</sup>H NMR of compound 9b in CDCl<sub>3</sub>

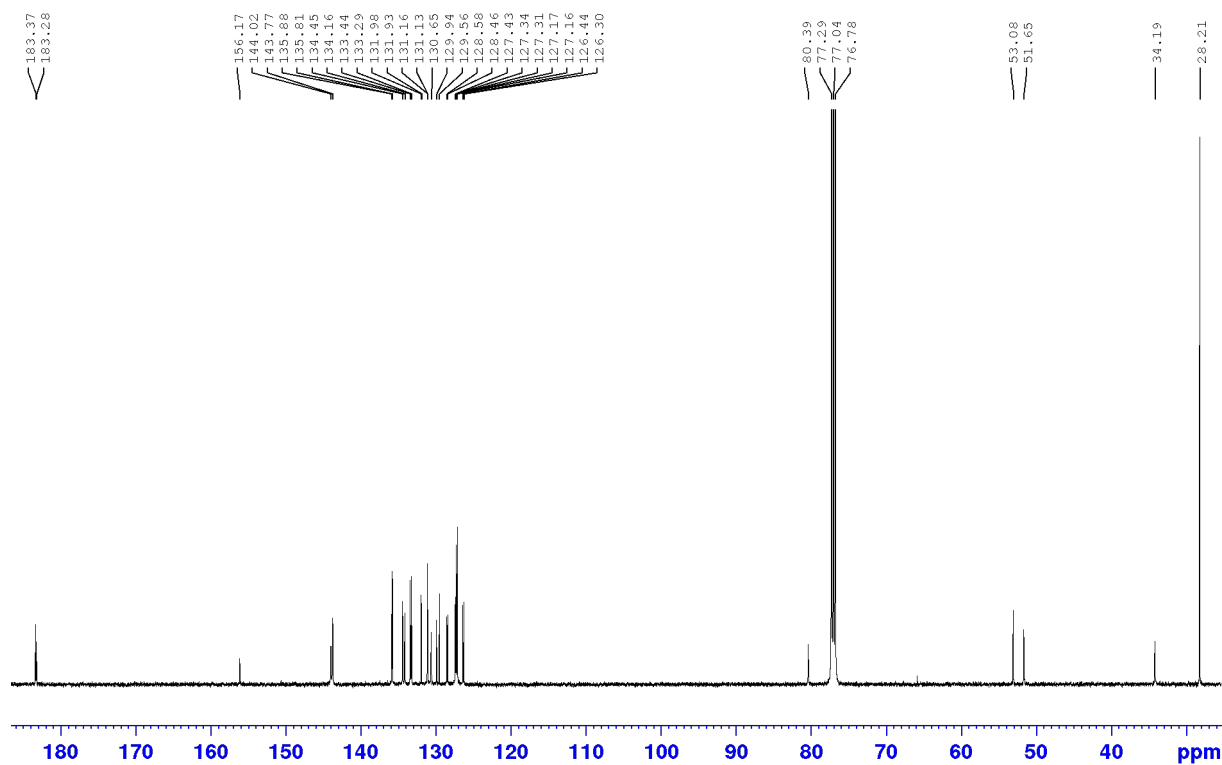

Figure S41. <sup>13</sup>C NMR of compound 9b in CDCl<sub>3</sub>

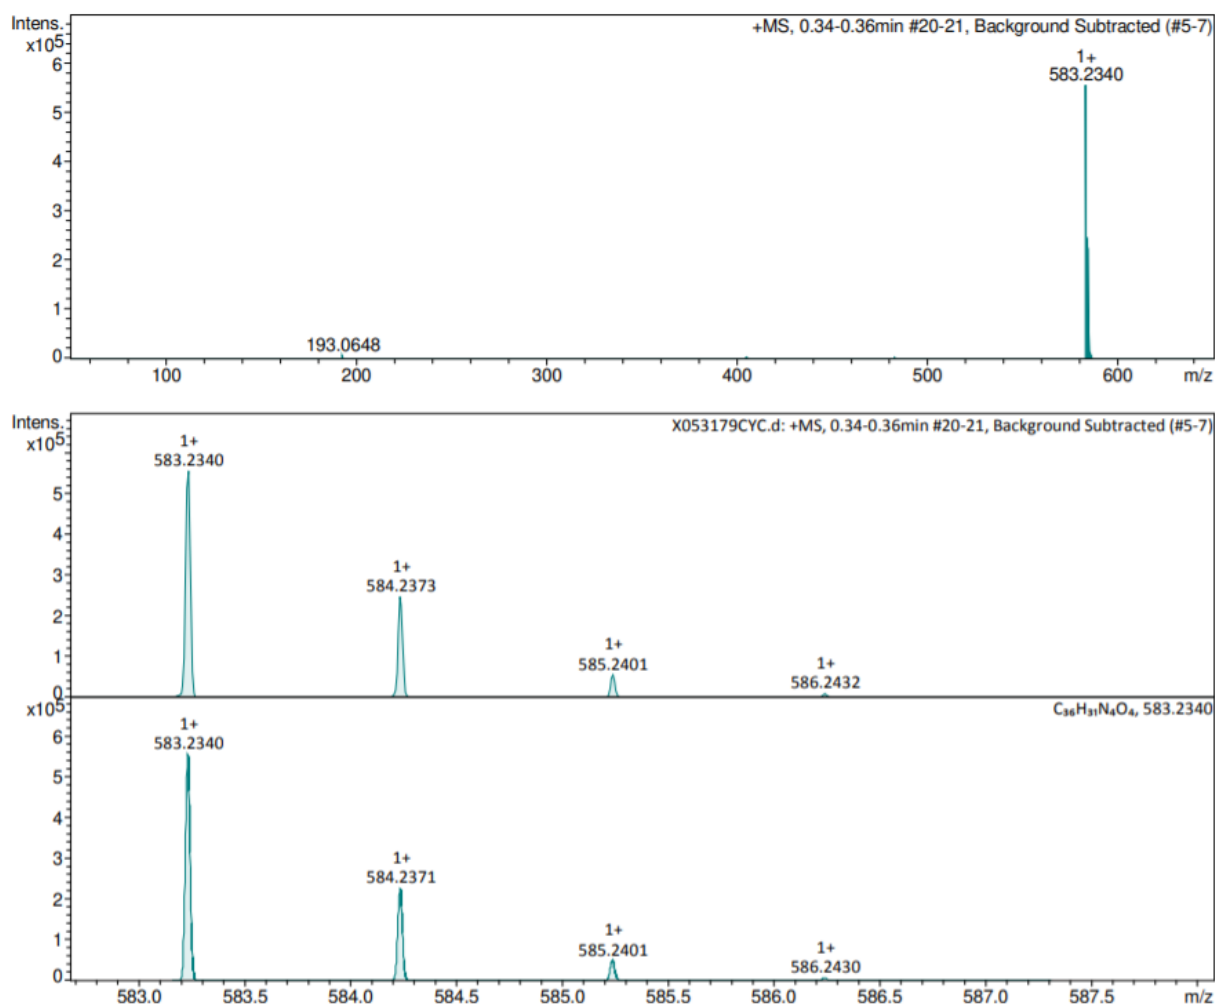

Figure S42. HRMS ESI<sup>+</sup> of compound **9b**

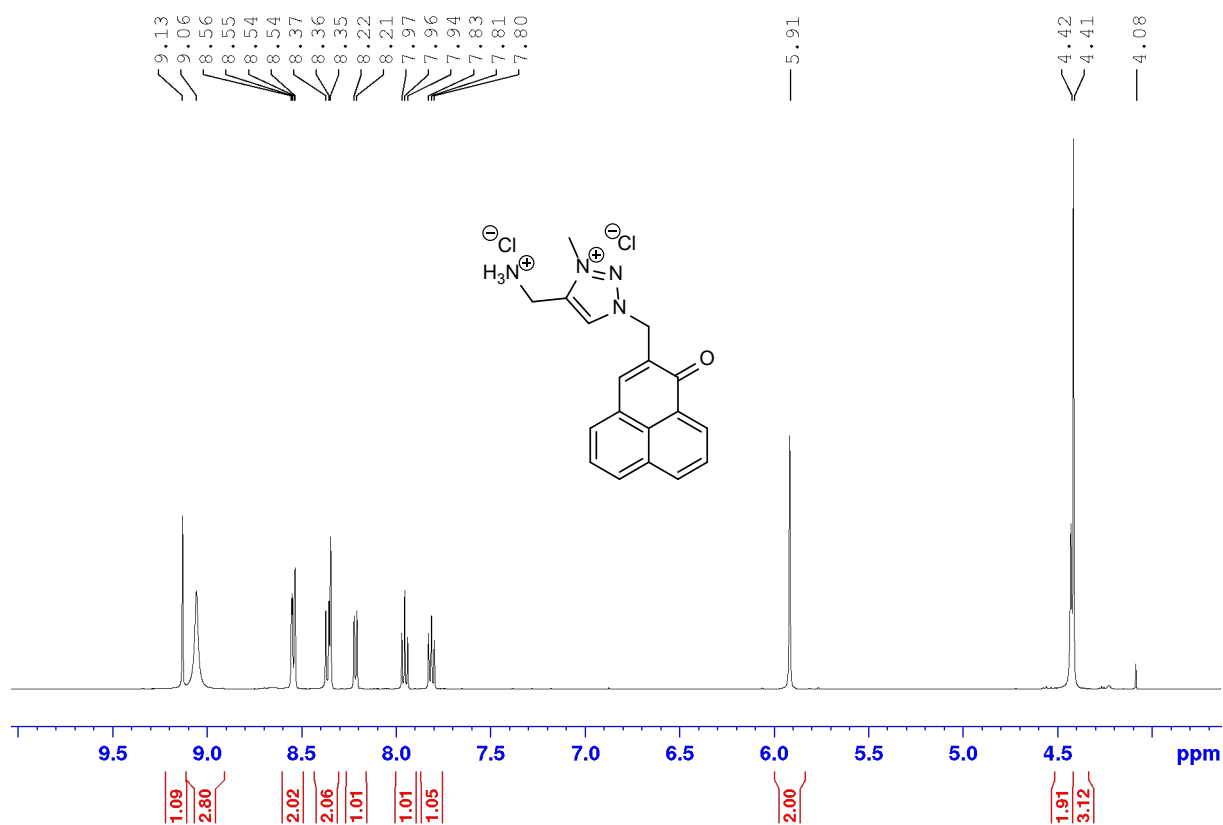

Figure S43. <sup>1</sup>H NMR of compound **10a** in DMSO-d<sub>6</sub>

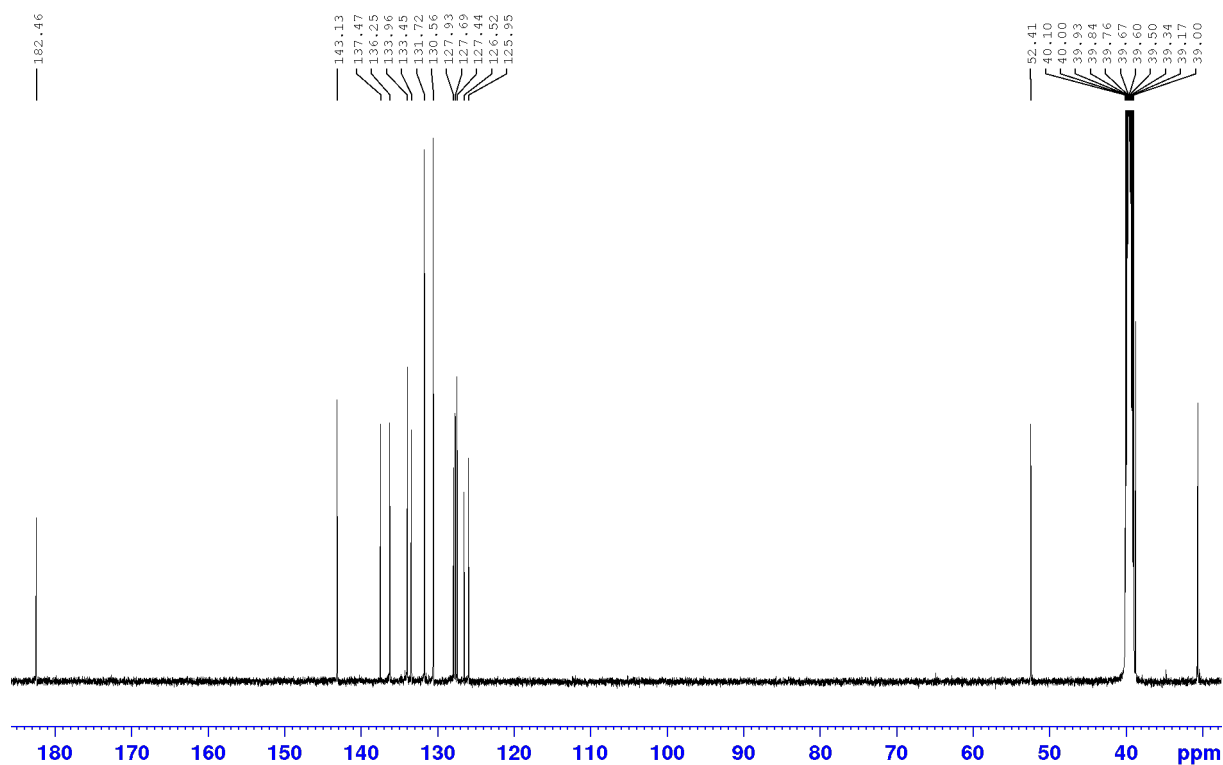

Figure S44. <sup>13</sup>C NMR of compound **10a** in DMSO-d<sub>6</sub>

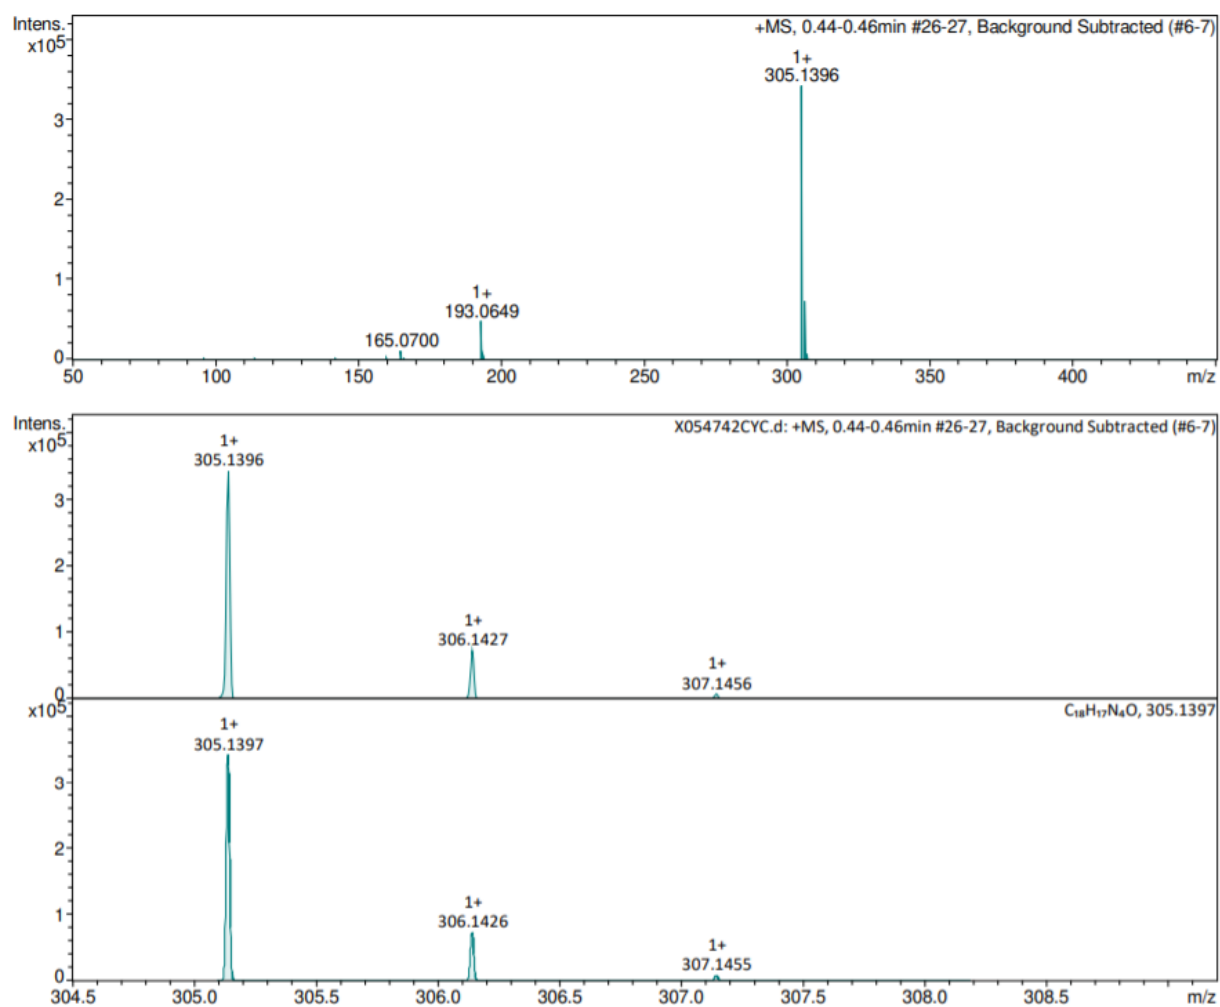

Figure S45. HRMS ESI<sup>+</sup> of compound **10a**

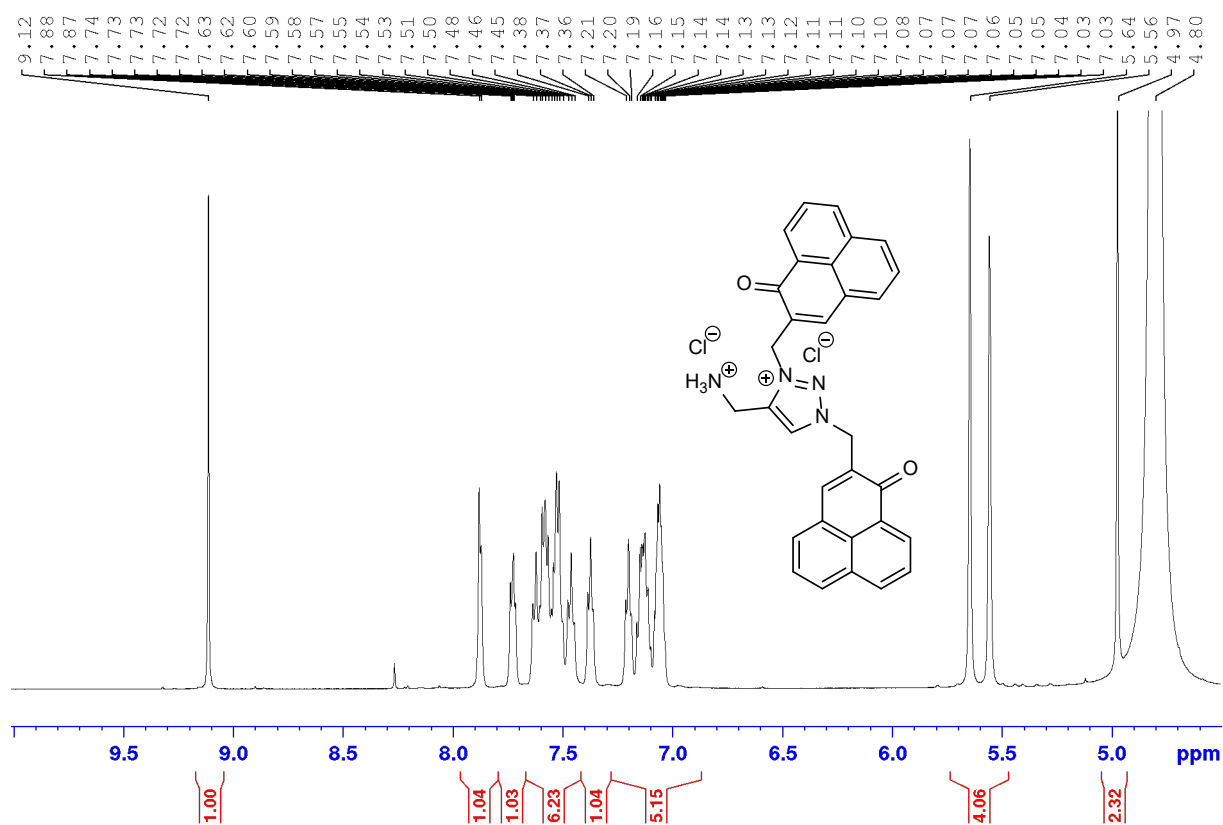

Figure S46.  $^1\text{H}$  NMR of compound **10b** in  $\text{D}_2\text{O}$

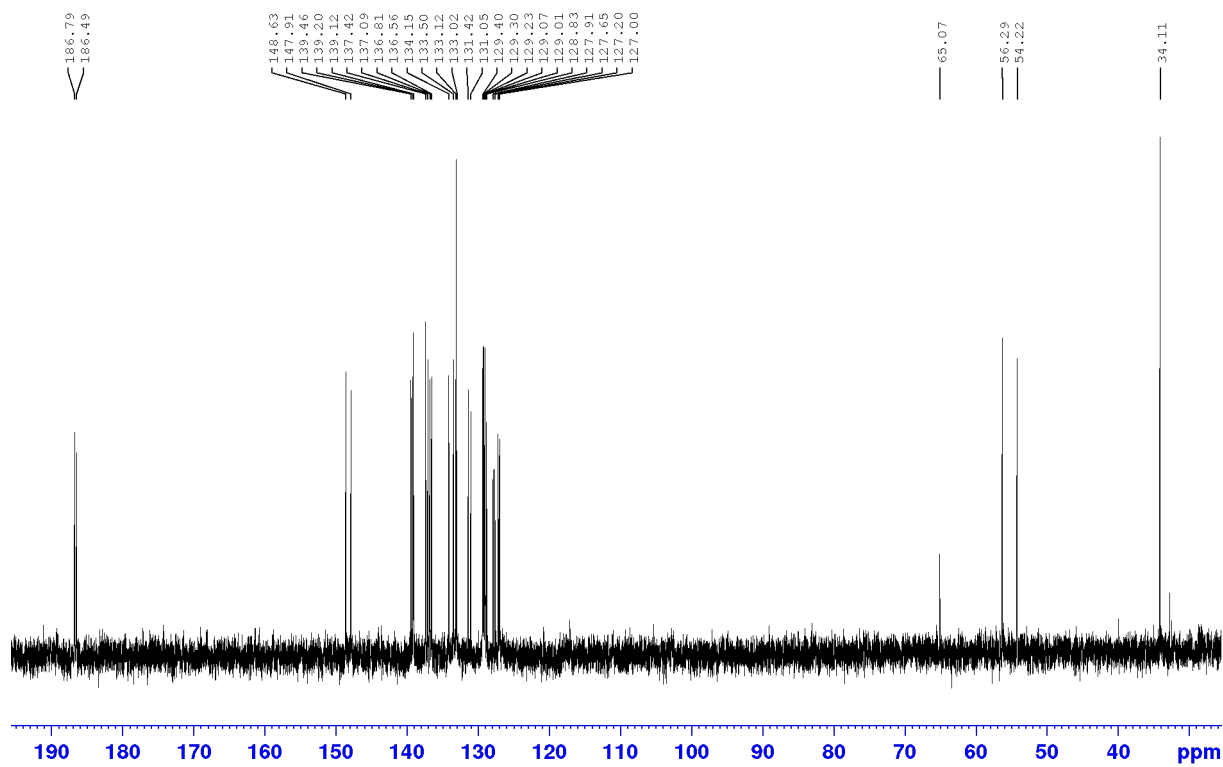

Figure S47.  $^{13}\text{C}$  NMR of compound **10b** in  $\text{D}_2\text{O}$

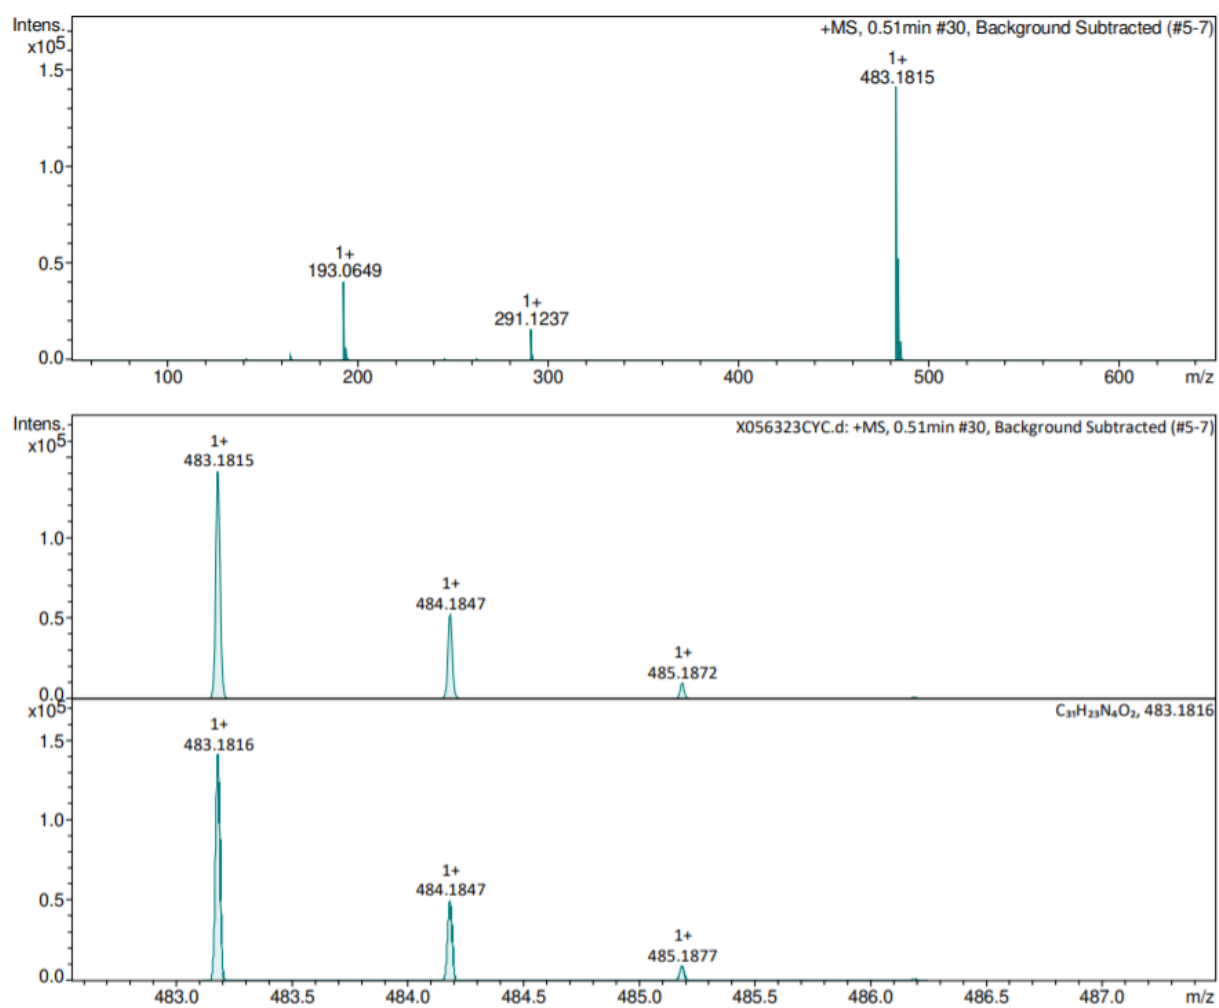

Figure S48. HRMS ESI<sup>+</sup> of compound **10b**

Figure S49 : Chemical structures of all compounds

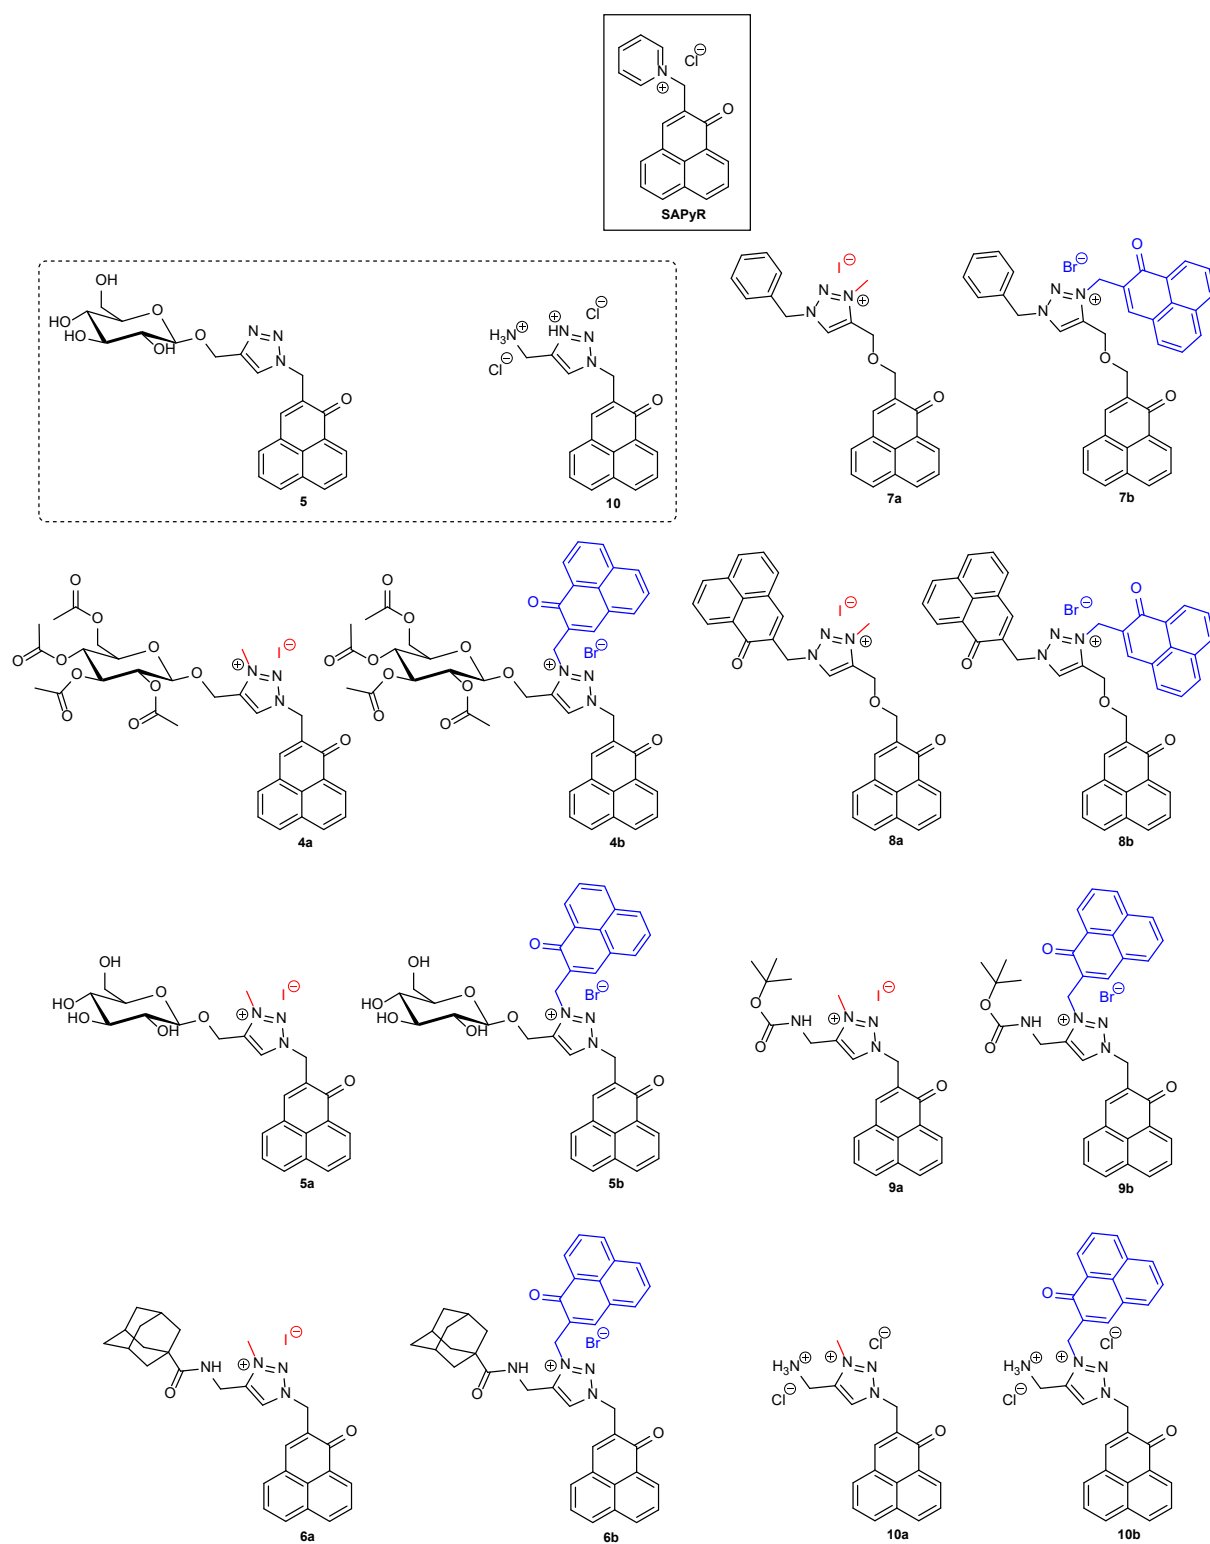

Supplement: s1 [file s1]
